# Supplementary material
Source: publisher figshare collection journal article supplement (https://acs.figshare.com/ndownloader/files/7573945)
Supplement: Supplementary file 1 [file 7573945]

data_pna2

_audit_creation_date              2011-06-26

_audit_creation_method

;

  Olex2 1.1

  (compiled 2011.02.15 svn.r1672, GUI svn.r3494)

;


_chemical_name_common 

;

N-(2,5-Dihydroxybenzyl)-N,N?-bis(2-pyridinylmethyl)-1,2-

ethanediamine trifluoroacetate

;

_chemical_name_systematic

;

 ? 

;

_chemical_formula_moiety          'C21 H24 N4 O2, C2 H F3 O2'

_chemical_formula_sum             'C23 H25 F3 N4 O4'

_chemical_formula_weight          478.47

_chemical_absolute_configuration  syn

_chemical_melting_point           ?

loop_

  _atom_type_symbol

  _atom_type_description

  _atom_type_scat_dispersion_real

  _atom_type_scat_dispersion_imag

  _atom_type_scat_source

 'C' 'C' 0.0033 0.0016 'International Tables Vol C Tables 4.2.6.8 and 6.1.1.4'

 'H' 'H' 0.0000 0.0000 'International Tables Vol C Tables 4.2.6.8 and 6.1.1.4'

 'N' 'N' 0.0061 0.0033 'International Tables Vol C Tables 4.2.6.8 and 6.1.1.4'

 'O' 'O' 0.0106 0.0060 'International Tables Vol C Tables 4.2.6.8 and 6.1.1.4'

 'F' 'F' 0.0171 0.0103 'International Tables Vol C Tables 4.2.6.8 and 6.1.1.4'


_space_group_crystal_system       'orthorhombic'

_space_group_IT_number            33

_space_group_name_H-M_alt         'P n a 21'

_space_group_name_Hall            'P 2c -2n'

loop_

  _space_group_symop_id

  _space_group_symop_operation_xyz

 1 'x, y, z'

 2 '-x, -y, z+1/2'

 3 'x+1/2, -y+1/2, z'

 4 '-x+1/2, y+1/2, z+1/2'


_cell_length_a                    14.7986(9)

_cell_length_b                    13.1965(8)

_cell_length_c                    11.7993(7)

_cell_angle_alpha                 90.00

_cell_angle_beta                  90.00

_cell_angle_gamma                 90.00

_cell_volume                      2304.3(2)

_cell_formula_units_Z             4

_cell_measurement_reflns_used     22805

_cell_measurement_temperature     180.(2)

_cell_measurement_theta_max       26.805

_cell_measurement_theta_min       2.316

_exptl_absorpt_coefficient_mu     0.112

_exptl_absorpt_correction_T_max   1

_exptl_absorpt_correction_T_min   0.843706

_exptl_absorpt_correction_type    psi-scan

_exptl_absorpt_process_details

;

 SADABS v.2.03 (Bruker,200?) was used for absorption correction.

 R(int) was 0.2624 before and 0.0370 after correction.

 The Ratio of minimum to maximum transmission is 0.843706.

 The \l/2 correction factor is 0.0015

;

_exptl_crystal_colour             ?

_exptl_crystal_density_diffrn     1.379

_exptl_crystal_density_meas       ?

_exptl_crystal_density_method     'not measured'

_exptl_crystal_description        Fragment

_exptl_crystal_F_000              1000

_exptl_crystal_size_max           0.22

_exptl_crystal_size_mid           0.17

_exptl_crystal_size_min           0.17

_exptl_special_details

;

 ? 

;

_diffrn_reflns_av_R_equivalents   0.0568

_diffrn_reflns_av_unetI/netI      0.0608

_diffrn_reflns_limit_h_max        19

_diffrn_reflns_limit_h_min        -19

_diffrn_reflns_limit_k_max        17

_diffrn_reflns_limit_k_min        -17

_diffrn_reflns_limit_l_max        15

_diffrn_reflns_limit_l_min        -15

_diffrn_reflns_number             22805

_diffrn_reflns_theta_full         28.32

_diffrn_reflns_theta_max          28.32

_diffrn_reflns_theta_min          2.07

_diffrn_ambient_temperature       180.(2)

_diffrn_detector_area_resol_mean  ?

_diffrn_measured_fraction_theta_full 0.997

_diffrn_measured_fraction_theta_max 0.997

_diffrn_measurement_device_type   'CCD area detector'

_diffrn_measurement_method        'phi and omega scans'

_diffrn_radiation_monochromator   graphite

_diffrn_radiation_type            MoK\a

_diffrn_radiation_wavelength      0.71073

_diffrn_source                    'fine-focus sealed tube'

_diffrn_source_current            40.0

_diffrn_source_power              2.0

_diffrn_source_voltage            50.0

_diffrn_standards_decay_%         ?

_diffrn_standards_interval_count  ?

_diffrn_standards_interval_time   ?

_diffrn_standards_number          ?

_reflns_number_gt                 3716

_reflns_number_total              5714

_reflns_threshold_expression      >2sigma(I)

_computing_cell_refinement        'SAINT v6.02A (Bruker, 2001)'

_computing_data_collection        ?

_computing_data_reduction         'SAINT v6.02A (Bruker, 2001)'

_computing_molecular_graphics

;

O. V. Dolomanov, L. J. Bourhis, R. J. Gildea, J. A. K. Howard and H. Puschmann,

OLEX2: a complete structure solution, refinement and analysis program.

J. Appl. Cryst. (2009). 42, 339-341.

;

_computing_publication_material

;

O. V. Dolomanov, L. J. Bourhis, R. J. Gildea, J. A. K. Howard and H. Puschmann,

OLEX2: a complete structure solution, refinement and analysis program.

J. Appl. Cryst. (2009). 42, 339-341.

;

_computing_structure_refinement   'SHELXL-97 (Sheldrick, 1997)'

_computing_structure_solution     'SHELXS-97 (Sheldrick, 1990)'

_refine_diff_density_max          0.295

_refine_diff_density_min          -0.285

_refine_diff_density_rms          0.042

_refine_ls_abs_structure_details  'Flack H D (1983), Acta Cryst. A39, 876-881'

_refine_ls_abs_structure_Flack    -0.5(9)

_refine_ls_extinction_coef        ?

_refine_ls_extinction_method      none

_refine_ls_goodness_of_fit_ref    0.936

_refine_ls_hydrogen_treatment     mixed

_refine_ls_matrix_type            full

_refine_ls_number_parameters      320

_refine_ls_number_reflns          5714

_refine_ls_number_restraints      3

_refine_ls_R_factor_all           0.0813

_refine_ls_R_factor_gt            0.0496

_refine_ls_restrained_S_all       0.938

_refine_ls_shift/su_max           0.000

_refine_ls_shift/su_mean          0.000

_refine_ls_structure_factor_coef  Fsqd

_refine_ls_weighting_details

'calc w=1/[\s^2^(Fo^2^)+(0.0682P)^2^+0.0000P] where P=(Fo^2^+2Fc^2^)/3'

_refine_ls_weighting_scheme       calc

_refine_ls_wR_factor_gt           0.1148

_refine_ls_wR_factor_ref          0.1231

_refine_special_details

;

Refinement of F^2^ against ALL reflections.  The weighted R-

factor wR and goodness of fit S are based on F^2^, conventional

R-factors R are based on F, with F set to zero for negative F^2^.

The threshold expression of F^2^ > 2sigma(F^2^) is used only for

calculating R-factors(gt) etc. and is not relevant to the choice

of reflections for refinement.  R-factors based on F^2^ are 

statistically about twice as large as those based on F, and R-

factors based on ALL data will be even larger. 

;

_atom_sites_solution_hydrogens    geom

_atom_sites_solution_primary      direct

_atom_sites_solution_secondary    difmap

loop_

  _atom_site_label

  _atom_site_type_symbol

  _atom_site_fract_x

  _atom_site_fract_y

  _atom_site_fract_z

  _atom_site_U_iso_or_equiv

  _atom_site_adp_type

  _atom_site_occupancy

  _atom_site_symmetry_multiplicity

  _atom_site_calc_flag

  _atom_site_refinement_flags

  _atom_site_disorder_assembly

  _atom_site_disorder_group

 O1 O 0.39804(10) 0.29696(12) 0.82534(16) 0.0430(4) Uani 1 1 d . . .

 H1 H 0.3507 0.3041 0.8638 0.065 Uiso 1 1 calc R . .

 O2 O 0.57568(14) 0.66145(13) 0.76035(19) 0.0612(6) Uani 1 1 d . . .

 H2 H 0.5601 0.7055 0.8078 0.092 Uiso 1 1 calc R . .

 N1 N 0.58195(12) 0.23157(13) 0.75776(16) 0.0328(4) Uani 1 1 d . . .

 N2 N 0.46154(12) 0.08039(14) 0.82468(17) 0.0374(5) Uani 1 1 d . . .

 H2A H 0.4838 0.1150 0.8819 0.045 Uiso 1 1 calc R . .

 N3 N 0.75358(13) 0.19949(13) 0.96346(18) 0.0362(4) Uani 1 1 d . . .

 N4 N 0.36866(13) 0.08785(15) 1.01965(18) 0.0409(5) Uani 1 1 d . . .

 C1 C 0.54395(16) 0.30253(18) 0.6740(2) 0.0367(5) Uani 1 1 d . . .

 H1A H 0.4937 0.2696 0.6327 0.044 Uiso 1 1 calc R . .

 H1B H 0.5910 0.3215 0.6183 0.044 Uiso 1 1 calc R . .

 C2 C 0.50981(15) 0.39615(17) 0.73348(19) 0.0342(5) Uani 1 1 d . . .

 C3 C 0.43860(14) 0.38957(16) 0.8107(2) 0.0354(5) Uani 1 1 d . . .

 C4 C 0.41284(15) 0.47600(17) 0.8693(2) 0.0392(5) Uani 1 1 d . . .

 H4 H 0.3638 0.4722 0.9211 0.047 Uiso 1 1 calc R . .

 C5 C 0.45644(15) 0.56720(18) 0.8542(2) 0.0402(6) Uani 1 1 d . . .

 H5 H 0.4377 0.6253 0.8956 0.048 Uiso 1 1 calc R . .

 C6 C 0.52746(17) 0.57388(18) 0.7789(2) 0.0413(6) Uani 1 1 d . . .

 C7 C 0.55278(16) 0.48892(17) 0.7189(2) 0.0395(6) Uani 1 1 d . . .

 H7 H 0.6010 0.4939 0.6661 0.047 Uiso 1 1 calc R . .

 C8 C 0.66385(14) 0.26956(18) 0.8109(2) 0.0366(5) Uani 1 1 d . . .

 H8A H 0.6630 0.3446 0.8102 0.044 Uiso 1 1 calc R . .

 H8B H 0.7170 0.2468 0.7668 0.044 Uiso 1 1 calc R . .

 C9 C 0.67260(14) 0.23306(15) 0.9309(2) 0.0321(5) Uani 1 1 d . . .

 C10 C 0.76490(18) 0.17219(18) 1.0713(2) 0.0453(6) Uani 1 1 d . . .

 H10 H 0.8224 0.1478 1.0946 0.054 Uiso 1 1 calc R . .

 C11 C 0.6973(2) 0.17783(19) 1.1496(2) 0.0509(7) Uani 1 1 d . . .

 H11 H 0.7084 0.1597 1.2263 0.061 Uiso 1 1 calc R . .

 C12 C 0.6131(2) 0.2099(2) 1.1168(2) 0.0500(7) Uani 1 1 d . . .

 H12 H 0.5648 0.2126 1.1697 0.060 Uiso 1 1 calc R . .

 C13 C 0.60001(17) 0.23808(18) 1.0061(2) 0.0404(6) Uani 1 1 d . . .

 H13 H 0.5424 0.2606 0.9810 0.048 Uiso 1 1 calc R . .

 C14 C 0.59404(15) 0.12913(18) 0.7129(2) 0.0402(6) Uani 1 1 d . . .

 H14A H 0.6381 0.0919 0.7604 0.048 Uiso 1 1 calc R . .

 H14B H 0.6185 0.1329 0.6350 0.048 Uiso 1 1 calc R . .

 C15 C 0.50512(18) 0.07255(19) 0.7116(2) 0.0429(6) Uani 1 1 d . . .

 H15A H 0.4649 0.1018 0.6531 0.052 Uiso 1 1 calc R . .

 H15B H 0.5158 0.0004 0.6927 0.052 Uiso 1 1 calc R . .

 C16 C 0.37578(16) 0.0225(2) 0.8289(2) 0.0471(6) Uani 1 1 d . . .

 H16A H 0.3889 -0.0503 0.8170 0.056 Uiso 1 1 calc R . .

 H16B H 0.3360 0.0453 0.7665 0.056 Uiso 1 1 calc R . .

 C17 C 0.32734(16) 0.03542(17) 0.9393(2) 0.0396(6) Uani 1 1 d . . .

 C18 C 0.3250(2) 0.09908(19) 1.1175(2) 0.0500(7) Uani 1 1 d . . .

 H18 H 0.3542 0.1356 1.1765 0.060 Uiso 1 1 calc R . .

 C19 C 0.2406(2) 0.0610(2) 1.1381(3) 0.0562(8) Uani 1 1 d . . .

 H19 H 0.2116 0.0727 1.2088 0.067 Uiso 1 1 calc R . .

 C20 C 0.1986(2) 0.0059(2) 1.0551(3) 0.0627(8) Uani 1 1 d . . .

 H20 H 0.1406 -0.0230 1.0677 0.075 Uiso 1 1 calc R . .

 C21 C 0.24209(18) -0.0068(2) 0.9528(3) 0.0525(7) Uani 1 1 d . . .

 H21 H 0.2144 -0.0437 0.8929 0.063 Uiso 1 1 calc R . .

 F3A F 0.34021(17) 0.2550(3) 0.5201(3) 0.1195(13) Uani 0.887(3) 1 d P A 1

 F1A F 0.26262(15) 0.1876(2) 0.3922(2) 0.0913(9) Uani 0.887(3) 1 d P A 1

 F2A F 0.2765(2) 0.1157(3) 0.5501(3) 0.1212(13) Uani 0.887(3) 1 d P A 1

 F1B F 0.3027(13) 0.251(2) 0.4232(17) 0.0913(9) Uani 0.113(3) 1 d P A 2

 F2B F 0.2534(19) 0.115(2) 0.462(3) 0.1212(13) Uani 0.113(3) 1 d P A 2

 F3B F 0.3269(17) 0.180(3) 0.575(3) 0.1195(13) Uani 0.113(3) 1 d P A 2

 C96 C 0.3222(2) 0.1682(2) 0.4722(3) 0.0565(7) Uani 1 1 d . . .

 C97 C 0.40594(18) 0.11391(19) 0.4278(2) 0.0445(6) Uani 1 1 d . A .

 O99 O 0.40915(14) 0.02359(15) 0.44766(19) 0.0652(6) Uani 1 1 d . . .

 H99 H 0.4614 0.0081 0.4693 0.098 Uiso 1 1 calc R A .

 O98 O 0.45978(13) 0.16713(14) 0.3731(2) 0.0651(6) Uani 1 1 d . . .


loop_

  _atom_site_aniso_label

  _atom_site_aniso_U_11

  _atom_site_aniso_U_22

  _atom_site_aniso_U_33

  _atom_site_aniso_U_23

  _atom_site_aniso_U_13

  _atom_site_aniso_U_12

 O1 0.0284(8) 0.0370(9) 0.0638(11) -0.0063(8) 0.0068(8) -0.0037(7)

 O2 0.0693(13) 0.0374(10) 0.0770(14) 0.0017(10) 0.0273(11) -0.0090(9)

 N1 0.0336(11) 0.0329(10) 0.0320(10) -0.0013(8) -0.0009(8) 0.0032(8)

 N2 0.0388(10) 0.0385(10) 0.0349(10) -0.0131(9) 0.0017(9) -0.0072(8)

 N3 0.0295(10) 0.0302(9) 0.0491(12) 0.0018(9) -0.0036(9) -0.0012(8)

 N4 0.0415(12) 0.0409(11) 0.0402(11) -0.0029(10) -0.0003(10) 0.0026(9)

 C1 0.0348(13) 0.0444(13) 0.0308(12) 0.0009(10) -0.0029(10) 0.0021(10)

 C2 0.0316(12) 0.0375(12) 0.0337(12) 0.0020(9) -0.0061(10) 0.0049(10)

 C3 0.0258(11) 0.0361(12) 0.0443(13) 0.0009(11) -0.0032(10) 0.0011(9)

 C4 0.0320(12) 0.0401(13) 0.0455(14) 0.0011(11) 0.0066(11) 0.0010(10)

 C5 0.0412(13) 0.0322(12) 0.0474(15) 0.0008(10) 0.0036(12) 0.0068(10)

 C6 0.0430(14) 0.0339(12) 0.0470(15) 0.0069(10) 0.0037(11) 0.0020(11)

 C7 0.0385(14) 0.0405(13) 0.0395(13) 0.0087(11) 0.0075(11) 0.0039(10)

 C8 0.0277(11) 0.0425(13) 0.0397(13) 0.0053(10) 0.0037(10) 0.0017(10)

 C9 0.0269(11) 0.0262(10) 0.0432(13) -0.0027(9) 0.0000(10) -0.0039(9)

 C10 0.0471(15) 0.0379(13) 0.0508(17) 0.0071(12) -0.0117(14) -0.0019(11)

 C11 0.068(2) 0.0472(15) 0.0380(14) 0.0084(12) -0.0059(14) -0.0171(13)

 C12 0.0578(18) 0.0495(15) 0.0426(15) 0.0014(12) 0.0126(13) -0.0212(13)

 C13 0.0314(12) 0.0442(13) 0.0455(15) -0.0026(11) 0.0038(11) -0.0031(10)

 C14 0.0411(14) 0.0414(13) 0.0381(14) -0.0049(11) 0.0078(11) 0.0060(10)

 C15 0.0495(15) 0.0405(13) 0.0389(14) -0.0111(10) 0.0058(12) 0.0007(11)

 C16 0.0408(14) 0.0515(15) 0.0489(15) -0.0089(13) -0.0054(13) -0.0118(11)

 C17 0.0378(13) 0.0317(11) 0.0492(14) 0.0004(11) -0.0028(11) 0.0027(10)

 C18 0.0603(19) 0.0424(14) 0.0475(16) 0.0042(12) 0.0020(14) 0.0125(13)

 C19 0.068(2) 0.0419(14) 0.0590(17) 0.0093(13) 0.0223(15) 0.0122(14)

 C20 0.0474(17) 0.0494(17) 0.091(2) 0.0087(15) 0.0189(17) 0.0007(13)

 C21 0.0448(15) 0.0468(15) 0.0659(19) -0.0005(14) 0.0026(15) -0.0041(12)

 F3A 0.0808(17) 0.098(2) 0.180(3) -0.094(2) -0.0294(19) 0.0309(17)

 F1A 0.0562(13) 0.143(2) 0.0751(16) -0.0135(16) -0.0247(12) 0.0310(15)

 F2A 0.125(2) 0.124(2) 0.115(3) 0.047(2) 0.069(2) 0.055(2)

 F1B 0.0562(13) 0.143(2) 0.0751(16) -0.0135(16) -0.0247(12) 0.0310(15)

 F2B 0.125(2) 0.124(2) 0.115(3) 0.047(2) 0.069(2) 0.055(2)

 F3B 0.0808(17) 0.098(2) 0.180(3) -0.094(2) -0.0294(19) 0.0309(17)

 C96 0.0569(18) 0.0618(18) 0.0507(17) -0.0076(15) -0.0062(16) 0.0103(15)

 C97 0.0558(16) 0.0396(14) 0.0381(13) -0.0036(11) -0.0107(12) 0.0066(12)

 O99 0.0701(14) 0.0513(12) 0.0742(14) 0.0078(10) 0.0115(11) 0.0178(10)

 O98 0.0565(11) 0.0492(12) 0.0896(15) 0.0069(11) 0.0049(12) 0.0027(9)


_geom_special_details

;

 All esds (except the esd in the dihedral angle between two l.s. planes) 

 are estimated using the full covariance matrix.  The cell esds are taken 

 into account individually in the estimation of esds in distances, angles 

 and torsion angles; correlations between esds in cell parameters are only 

 used when they are defined by crystal symmetry.  An approximate (isotropic) 

 treatment of cell esds is used for estimating esds involving l.s. planes. 

;

loop_

  _geom_bond_atom_site_label_1

  _geom_bond_atom_site_label_2

  _geom_bond_distance

  _geom_bond_site_symmetry_2

  _geom_bond_publ_flag

 O1 C3 1.372(3) . ?

 O2 C6 1.376(3) . ?

 N1 C1 1.473(3) . ?

 N1 C8 1.454(3) . ?

 N1 C14 1.463(3) . ?

 N2 C15 1.486(3) . ?

 N2 C16 1.482(3) . ?

 N3 C9 1.334(3) . ?

 N3 C10 1.333(3) . ?

 N4 C17 1.323(3) . ?

 N4 C18 1.331(3) . ?

 C1 C2 1.508(3) . ?

 C2 C3 1.396(3) . ?

 C2 C7 1.390(3) . ?

 C3 C4 1.387(3) . ?

 C4 C5 1.377(3) . ?

 C5 C6 1.380(3) . ?

 C6 C7 1.378(3) . ?

 C8 C9 1.501(3) . ?

 C9 C13 1.394(3) . ?

 C10 C11 1.364(4) . ?

 C11 C12 1.371(4) . ?

 C12 C13 1.372(4) . ?

 C14 C15 1.513(4) . ?

 C16 C17 1.497(4) . ?

 C17 C21 1.388(4) . ?

 C18 C19 1.368(4) . ?

 C19 C20 1.370(4) . ?

 C20 C21 1.378(4) . ?

 F3A C96 1.304(4) . ?

 F1A C96 1.316(4) . ?

 F2A C96 1.335(4) . ?

 F1B C96 1.27(2) . ?

 F2B C96 1.24(3) . ?

 F3B C96 1.22(3) . ?

 C96 C97 1.524(4) . ?

 C97 O99 1.216(3) . ?

 C97 O98 1.243(3) . ?


loop_

  _geom_angle_atom_site_label_1

  _geom_angle_atom_site_label_2

  _geom_angle_atom_site_label_3

  _geom_angle

  _geom_angle_site_symmetry_1

  _geom_angle_site_symmetry_3

  _geom_angle_publ_flag

 C8 N1 C1 112.86(17) . . ?

 C8 N1 C14 111.89(18) . . ?

 C14 N1 C1 113.07(18) . . ?

 C16 N2 C15 111.46(18) . . ?

 C10 N3 C9 118.5(2) . . ?

 C17 N4 C18 117.1(2) . . ?

 N1 C1 C2 109.70(19) . . ?

 C3 C2 C1 120.4(2) . . ?

 C7 C2 C1 120.7(2) . . ?

 C7 C2 C3 118.7(2) . . ?

 O1 C3 C2 117.9(2) . . ?

 O1 C3 C4 123.3(2) . . ?

 C4 C3 C2 118.8(2) . . ?

 C5 C4 C3 121.7(2) . . ?

 C4 C5 C6 119.7(2) . . ?

 O2 C6 C5 123.4(2) . . ?

 O2 C6 C7 117.5(2) . . ?

 C7 C6 C5 119.1(2) . . ?

 C6 C7 C2 121.9(2) . . ?

 N1 C8 C9 111.61(18) . . ?

 N3 C9 C8 117.1(2) . . ?

 N3 C9 C13 121.6(2) . . ?

 C13 C9 C8 121.2(2) . . ?

 N3 C10 C11 122.7(2) . . ?

 C10 C11 C12 119.5(2) . . ?

 C11 C12 C13 118.7(3) . . ?

 C12 C13 C9 118.9(2) . . ?

 N1 C14 C15 110.70(18) . . ?

 N2 C15 C14 109.51(19) . . ?

 N2 C16 C17 112.35(19) . . ?

 N4 C17 C16 117.5(2) . . ?

 N4 C17 C21 123.2(3) . . ?

 C21 C17 C16 119.3(2) . . ?

 N4 C18 C19 123.8(3) . . ?

 C18 C19 C20 118.8(3) . . ?

 C19 C20 C21 118.6(3) . . ?

 C20 C21 C17 118.4(3) . . ?

 F3A C96 F1A 106.1(3) . . ?

 F3A C96 F2A 105.1(3) . . ?

 F3A C96 C97 113.3(3) . . ?

 F1A C96 F2A 104.8(3) . . ?

 F1A C96 C97 113.0(2) . . ?

 F2A C96 C97 113.8(3) . . ?

 F1B C96 F3A 59.1(11) . . ?

 F1B C96 F1A 49.9(11) . . ?

 F1B C96 F2A 130.2(9) . . ?

 F1B C96 C97 115.7(9) . . ?

 F2B C96 F3A 135.0(11) . . ?

 F2B C96 F1A 59.3(14) . . ?

 F2B C96 F2A 50.3(15) . . ?

 F2B C96 F1B 104.8(16) . . ?

 F2B C96 C97 111.5(11) . . ?

 F3B C96 F3A 56.2(17) . . ?

 F3B C96 F1A 136.2(11) . . ?

 F3B C96 F2A 54.3(17) . . ?

 F3B C96 F1B 110.4(17) . . ?

 F3B C96 F2B 103(2) . . ?

 F3B C96 C97 110.8(11) . . ?

 O99 C97 C96 115.2(3) . . ?

 O99 C97 O98 129.0(3) . . ?

 O98 C97 C96 115.7(2) . . ?


#===END


data_[Mn(H4qtp2)Br2]

_chemical_name_systematic               ?

_chemical_name_common                   [Mn(H4qtp2)Br2]

_chemical_formula_moiety    'C28 H28 Br2 Mn N4 O4, (H2O) (C2H3N)'

_chemical_formula_sum       'C30 H33 Br2 Mn N5 O5'

_chemical_formula_iupac                 ?

_chemical_formula_weight                758.35

_chemical_melting_point                 ?


_space_group_crystal_system             monoclinic

_space_group_name_H-M_alt               'P 1 21/n 1'

_space_group_name_Hall                  '-P 2yn'

loop_

    _space_group_symop_operation_xyz

    'x, y, z'

    '-x+1/2, y+1/2, -z+1/2'

    '-x, -y, -z'

    'x-1/2, -y-1/2, z-1/2'


_cell_length_a                          9.6411(2)

_cell_length_b                          21.9027(6)

_cell_length_c                          15.3507(4)

_cell_angle_alpha                       90

_cell_angle_beta                        99.8810(10)

_cell_angle_gamma                       90

_cell_volume                            3193.46(14)

_cell_formula_units_Z                   4

_cell_measurement_reflns_used           8877

_cell_measurement_theta_min             2.2961

_cell_measurement_theta_max             20.6360

_cell_measurement_temperature           180.(2)


_exptl_crystal_description              Fragment

_exptl_crystal_colour                   'clear light orange'

_exptl_crystal_size_max                 0.200

_exptl_crystal_size_mid                 0.200

_exptl_crystal_size_min                 0.020

_exptl_crystal_density_diffrn           1.577

_exptl_crystal_density_meas             ?

_exptl_crystal_density_method           'not measured'

_exptl_crystal_F_000                    1532.0


_exptl_absorpt_coefficient_mu           2.961

_exptl_absorpt_correction_type          multi-scan

_exptl_absorpt_process_details          'SADABS V2008/1 (Bruker AXS Inc.)'

_exptl_absorpt_correction_T_min         0.560

_exptl_absorpt_correction_T_max         0.943


_exptl_special_details                  

;

; 


_diffrn_ambient_temperature             180.(2)


_diffrn_measurement_device_type   'CCD area detector'

_diffrn_measurement_method        'phi and omega scans'

_diffrn_radiation_monochromator   graphite

_diffrn_radiation_type            MoK\a

_diffrn_radiation_wavelength      0.71073

_diffrn_source                    'fine-focus sealed tube'


_diffrn_detector_area_resol_mean        8.3333


_diffrn_reflns_number                   31999

_diffrn_reflns_av_R_equivalents         0.0412

_diffrn_reflns_av_sigmaI/netI           0.0247

_diffrn_reflns_theta_min                1.64

_diffrn_reflns_theta_max                20.84

_diffrn_reflns_theta_full               20.84

_diffrn_measured_fraction_theta_max     0.999

_diffrn_measured_fraction_theta_full    0.999

_diffrn_reflns_limit_h_min              -9

_diffrn_reflns_limit_h_max              8

_diffrn_reflns_limit_k_min              -21

_diffrn_reflns_limit_k_max              21

_diffrn_reflns_limit_l_min              -15

_diffrn_reflns_limit_l_max              15


_refine_special_details                 

;

Refinement of F^2^ against ALL reflections.  The weighted R-factor

wR and goodness of fit S are based on F^2^, conventional

R-factors R are based on F, with F set to zero for negative F^2^.


The threshold expression of F^2^ > 2sigma(F^2^) is used only for 


calculating R-factors(gt) etc. and is not relevant to the choice


of reflections for refinement.  R-factors based on F^2^ are

 statistically about twice as large as those based on F, and R-


factors based on ALL data will be even larger.

;


_reflns_number_total                    3364

_reflns_number_gt                       3031

_reflns_threshold_expression            >2sigma(I)


_refine_ls_structure_factor_coef        Fsqd

_refine_ls_matrix_type                  full

_refine_ls_R_factor_all                 0.0646

_refine_ls_R_factor_gt                  0.0566

_refine_ls_wR_factor_gt                 0.1071

_refine_ls_wR_factor_ref                0.1104

_refine_ls_goodness_of_fit_ref          1.178

_refine_ls_restrained_S_all             1.176

_refine_ls_number_reflns                3364

_refine_ls_number_parameters            358

_refine_ls_number_restraints            12

_refine_ls_hydrogen_treatment           mixed

_refine_ls_weighting_scheme             calc

_refine_ls_weighting_details

    'calc w=1/[\s^2^(Fo^2^)+(0.0188P)^2^+16.3405P] where P=(Fo^2^+2Fc^2^)/3'


_atom_sites_solution_hydrogens          geom

_atom_sites_solution_primary            direct

_atom_sites_solution_secondary          difmap


_refine_ls_shift/su_max                 0.000

_refine_ls_shift/su_mean                0.000

_refine_diff_density_max                0.429

_refine_diff_density_min                -0.719

_refine_ls_extinction_method            none

_refine_ls_extinction_coef              ?


loop_

    _atom_type_symbol

    _atom_type_description

    _atom_type_scat_dispersion_real

    _atom_type_scat_dispersion_imag

    _atom_type_scat_source

    C C 0.0033 0.0016 'International Tables Vol C Tables 4.2.6.8 and 6.1.1.4'

    H H 0.0000 0.0000 'International Tables Vol C Tables 4.2.6.8 and 6.1.1.4'

    N N 0.0061 0.0033 'International Tables Vol C Tables 4.2.6.8 and 6.1.1.4'

    O O 0.0106 0.0060 'International Tables Vol C Tables 4.2.6.8 and 6.1.1.4'

    Mn Mn 0.3368 0.7283

     'International Tables Vol C Tables 4.2.6.8 and 6.1.1.4'

    Br Br -0.2901 2.4595

     'International Tables Vol C Tables 4.2.6.8 and 6.1.1.4'


_computing_data_collection              ?

_computing_cell_refinement              'SAINT V8.18C (Bruker AXS Inc., 2011)'

_computing_data_reduction               'SAINT V8.18C (Bruker AXS Inc., 2011)'

_computing_structure_solution           'SHELXS-97 (Sheldrick, 2008)'

_computing_structure_refinement         'SHELXL-97 (Sheldrick, 2008)'

_computing_molecular_graphics           ?

_computing_publication_material         ?


loop_

    _atom_site_type_symbol

    _atom_site_label

    _atom_site_fract_x

    _atom_site_fract_y

    _atom_site_fract_z

    _atom_site_U_iso_or_equiv

    _atom_site_adp_type

    _atom_site_calc_flag

    _atom_site_refinement_flags

    _atom_site_occupancy

    _atom_site_disorder_assembly

    _atom_site_disorder_group

    C C9 0.2658(10) 0.4804(4) 0.8120(6) 0.064(3) Uani d . 1 A 4

    H H9 0.2798 0.4734 0.7544 0.076 Uiso calc R 1 A 4

    N N1 0.3179(5) 0.2438(3) 0.7094(3) 0.0331(14) Uani d D 1 A 4

    C C1 0.2840(7) 0.1892(4) 0.6732(4) 0.0390(19) Uani d D 1 A 4

    H H1 0.356 0.1654 0.658 0.047 Uiso calc R 1 A 4

    C C2 0.1512(8) 0.1663(3) 0.6572(5) 0.044(2) Uani d D 1 A 4

    H H2 0.1338 0.1275 0.633 0.053 Uiso calc R 1 A 4

    C C3 0.0444(7) 0.2009(4) 0.6774(5) 0.049(2) Uani d D 1 A 4

    H H3A -0.0477 0.1866 0.6657 0.059 Uiso calc R 1 A 4

    C C4 0.0742(7) 0.2580(4) 0.7156(5) 0.046(2) Uani d D 1 A 4

    H H4A 0.0027 0.2821 0.731 0.055 Uiso calc R 1 A 4

    C C5 0.2113(7) 0.2785(3) 0.7301(4) 0.0390(19) Uani d D 1 A 4

    N N4 0.7371(6) 0.3131(3) 0.8427(4) 0.0424(16) Uani d D 1 A 4

    C C28 0.8078(7) 0.3639(4) 0.8297(5) 0.049(2) Uani d D 1 A 4

    H H28 0.7699 0.3897 0.7836 0.058 Uiso calc R 1 A 4

    C C27 0.9331(7) 0.3798(4) 0.8811(5) 0.045(2) Uani d D 1 A 4

    H H27 0.9782 0.416 0.8707 0.054 Uiso calc R 1 A 4

    C C26 0.9909(8) 0.3413(4) 0.9483(5) 0.048(2) Uani d D 1 A 4

    H H26 1.0767 0.3506 0.9835 0.058 Uiso calc R 1 A 4

    C C25 0.9202(7) 0.2888(4) 0.9626(5) 0.047(2) Uani d D 1 A 4

    H H25 0.9578 0.2622 1.0077 0.057 Uiso calc R 1 A 4

    C C24 0.7925(7) 0.2758(3) 0.9094(4) 0.0420(19) Uani d D 1 A 4

    Br Br1 0.52043(9) 0.36093(5) 0.63027(5) 0.0676(3) Uani d . 1 A 4

    Br Br2 0.66140(9) 0.19360(6) 0.68328(6) 0.0812(4) Uani d . 1 A 4

    Mn Mn1 0.53500(11) 0.27990(5) 0.75745(7) 0.0395(3) Uani d . 1 A 4

    O O4 0.6869(8) 0.0079(3) 1.0924(5) 0.098(2) Uani d . 1 A 4

    H H4 0.7424 0.0083 1.0575 0.147 Uiso calc R 1 A 4

    O O1 0.3980(6) 0.4251(2) 1.0321(3) 0.0620(16) Uani d . 1 A 4

    H H1A 0.3756 0.4355 1.0791 0.093 Uiso calc R 1 A 4

    N N2 0.3870(6) 0.3368(3) 0.8321(4) 0.0396(15) Uani d . 1 A 4

    N N3 0.5578(6) 0.2292(3) 0.8938(4) 0.0410(16) Uani d . 1 A 4

    C C14 0.3670(8) 0.3014(4) 0.9114(5) 0.049(2) Uani d . 1 A 4

    H H14A 0.2968 0.27 0.8944 0.059 Uiso calc R 1 A 4

    H H14B 0.3329 0.3284 0.9533 0.059 Uiso calc R 1 A 4

    C C15 0.5056(7) 0.2718(4) 0.9556(4) 0.044(2) Uani d . 1 A 4

    H H15A 0.5755 0.3033 0.9735 0.053 Uiso calc R 1 A 4

    H H15B 0.4907 0.2499 1.008 0.053 Uiso calc R 1 A 4

    C C16 0.4794(8) 0.1697(4) 0.8877(5) 0.051(2) Uani d . 1 A 4

    H H16A 0.514 0.1445 0.844 0.061 Uiso calc R 1 A 4

    H H16B 0.381 0.1781 0.8654 0.061 Uiso calc R 1 A 4

    C C17 0.4875(9) 0.1325(4) 0.9712(5) 0.055(2) Uani d . 1 A 4

    C C22 0.3894(9) 0.1388(5) 1.0259(6) 0.072(3) Uani d . 1 A 4

    O O3 0.2812(7) 0.1810(4) 1.0022(4) 0.108(3) Uani d . 1 A 4

    H H3 0.2298 0.1811 1.0396 0.163 Uiso calc R 1 A 4

    C C21 0.3902(11) 0.1021(6) 1.1012(6) 0.095(4) Uani d . 1 A 4

    H H21 0.32 0.1066 1.1354 0.114 Uiso calc R 1 A 4

    C C20 0.4913(11) 0.0610(5) 1.1234(7) 0.080(3) Uani d . 1 A 4

    H H20 0.4945 0.0384 1.175 0.096 Uiso calc R 1 A 4

    C C19 0.5909(10) 0.0517(4) 1.0709(6) 0.065(3) Uani d . 1 A 4

    C C18 0.5901(9) 0.0886(4) 0.9923(6) 0.062(2) Uani d . 1 A 4

    H H18 0.6579 0.0826 0.9566 0.075 Uiso calc R 1 A 4

    C C23 0.7093(7) 0.2197(4) 0.9229(5) 0.047(2) Uani d . 1 A 4

    H H23A 0.7404 0.186 0.89 0.057 Uiso calc R 1 A 4

    H H23B 0.7267 0.2088 0.9851 0.057 Uiso calc R 1 A 4

    C C7 0.4441(8) 0.3997(4) 0.8572(5) 0.050(2) Uani d . 1 A 4

    H H7A 0.5192 0.3957 0.9077 0.06 Uiso calc R 1 A 4

    H H7B 0.4857 0.4155 0.8085 0.06 Uiso calc R 1 A 4

    C C8 0.3416(8) 0.4462(3) 0.8795(5) 0.045(2) Uani d . 1 A 4

    C C10 0.1729(13) 0.5232(4) 0.8262(7) 0.091(4) Uani d . 1 A 4

    C C11 0.1475(10) 0.5334(4) 0.9109(8) 0.073(3) Uani d . 1 A 4

    H H11 0.0806 0.5619 0.9211 0.087 Uiso calc R 1 A 4

    C C12 0.2233(8) 0.5006(4) 0.9803(6) 0.053(2) Uani d . 1 A 4

    H H12 0.2093 0.5079 1.0378 0.064 Uiso calc R 1 A 4

    C C13 0.3200(7) 0.4568(3) 0.9645(5) 0.0421(19) Uani d . 1 A 4

    C C6 0.2536(7) 0.3399(3) 0.7688(5) 0.0417(19) Uani d . 1 A 4

    H H6A 0.2641 0.3681 0.7216 0.05 Uiso calc R 1 A 4

    H H6B 0.18 0.3554 0.7987 0.05 Uiso calc R 1 A 4

    O O2 0.1013(11) 0.5566(3) 0.7561(5) 0.141(4) Uani d . 1 A 4

    H H2A 0.0273 0.5693 0.7688 0.211 Uiso calc R 1 A 4


loop_

    _atom_site_aniso_label

    _atom_site_aniso_U_11

    _atom_site_aniso_U_22

    _atom_site_aniso_U_33

    _atom_site_aniso_U_12

    _atom_site_aniso_U_13

    _atom_site_aniso_U_23

    C9 0.103(8) 0.030(5) 0.053(6) -0.013(5) -0.002(5) 0.000(5)

    N1 0.022(3) 0.046(4) 0.032(3) -0.004(3) 0.007(3) 0.002(3)

    C1 0.033(5) 0.058(6) 0.027(4) 0.011(4) 0.009(3) 0.004(4)

    C2 0.040(5) 0.049(5) 0.041(5) -0.008(4) -0.002(4) 0.001(4)

    C3 0.024(4) 0.075(7) 0.046(5) -0.011(5) 0.001(4) 0.005(5)

    C4 0.026(5) 0.066(6) 0.048(5) 0.005(4) 0.014(4) -0.010(4)

    C5 0.031(5) 0.057(5) 0.028(4) 0.005(4) 0.004(3) 0.006(4)

    N4 0.033(4) 0.066(5) 0.027(4) -0.006(4) 0.002(3) 0.000(3)

    C28 0.038(5) 0.068(6) 0.043(5) 0.000(4) 0.017(4) 0.005(4)

    C27 0.025(4) 0.061(6) 0.051(5) -0.015(4) 0.015(4) -0.011(5)

    C26 0.033(5) 0.066(6) 0.043(5) -0.004(5) 0.000(4) -0.013(5)

    C25 0.033(5) 0.065(6) 0.042(5) -0.006(4) -0.001(4) -0.002(4)

    C24 0.036(5) 0.056(5) 0.032(4) 0.002(4) 0.001(4) -0.006(4)

    Br1 0.0604(6) 0.0975(8) 0.0437(5) -0.0178(5) 0.0056(4) 0.0186(5)

    Br2 0.0372(5) 0.1542(11) 0.0486(5) 0.0336(6) -0.0025(4) -0.0280(6)

    Mn1 0.0267(6) 0.0644(8) 0.0272(6) -0.0026(6) 0.0042(5) 0.0005(6)

    O4 0.117(6) 0.080(5) 0.085(5) 0.004(5) -0.020(4) 0.001(4)

    O1 0.074(4) 0.069(4) 0.040(3) 0.015(3) 0.001(3) 0.000(3)

    N2 0.039(4) 0.045(4) 0.037(4) -0.010(3) 0.010(3) -0.007(3)

    N3 0.030(3) 0.058(4) 0.033(3) -0.017(3) 0.000(3) -0.001(3)

    C14 0.046(5) 0.069(6) 0.037(5) -0.015(4) 0.018(4) -0.013(4)

    C15 0.041(5) 0.063(6) 0.030(4) -0.011(4) 0.013(4) -0.011(4)

    C16 0.055(5) 0.060(6) 0.035(5) -0.010(4) -0.001(4) -0.007(4)

    C17 0.050(5) 0.061(6) 0.045(5) -0.021(5) -0.017(5) 0.008(4)

    C22 0.042(6) 0.108(8) 0.064(6) -0.016(6) 0.002(5) 0.030(6)

    O3 0.065(4) 0.180(8) 0.088(5) 0.015(5) 0.034(4) 0.070(5)

    C21 0.057(7) 0.152(11) 0.072(7) -0.005(7) 0.000(5) 0.056(7)

    C20 0.053(6) 0.110(9) 0.072(7) -0.021(6) -0.004(6) 0.026(6)

    C19 0.060(6) 0.049(6) 0.071(7) -0.007(5) -0.029(6) 0.007(5)

    C18 0.059(6) 0.050(6) 0.069(6) -0.018(5) -0.016(5) -0.004(5)

    C23 0.043(5) 0.062(6) 0.033(4) -0.005(4) -0.005(4) 0.001(4)

    C7 0.043(5) 0.064(6) 0.044(5) -0.023(4) 0.011(4) -0.005(4)

    C8 0.044(5) 0.041(5) 0.050(6) -0.010(4) 0.008(4) -0.003(4)

    C10 0.142(10) 0.032(6) 0.074(8) -0.010(7) -0.056(7) 0.007(6)

    C11 0.071(6) 0.034(5) 0.100(8) 0.012(5) -0.024(6) -0.010(6)

    C12 0.060(6) 0.034(5) 0.065(6) -0.013(5) 0.012(5) -0.005(4)

    C13 0.040(5) 0.042(5) 0.040(5) -0.003(4) -0.007(4) 0.001(4)

    C6 0.032(4) 0.042(5) 0.051(5) 0.002(4) 0.009(4) -0.007(4)

    O2 0.233(10) 0.036(4) 0.112(6) 0.047(5) -0.088(6) -0.012(4)


_geom_special_details                   

;

All esds (except the esd in the dihedral angle between two l.s. planes)

are estimated using the full covariance matrix.  The cell esds are taken

into account individually in the estimation of esds in distances, angles

and torsion angles; correlations between esds in cell parameters are only

used when they are defined by crystal symmetry.  An approximate (isotropic)

treatment of cell esds is used for estimating esds involving l.s. planes.

;


loop_

    _geom_bond_atom_site_label_1

    _geom_bond_atom_site_label_2

    _geom_bond_site_symmetry_2

    _geom_bond_distance

    _geom_bond_publ_flag

    C9 C10 . 1.341(14) ?

    C9 C8 . 1.381(11) ?

    C9 H9 . 0.93 ?

    N1 C1 . 1.335(8) ?

    N1 C5 . 1.358(8) ?

    N1 Mn1 . 2.241(5) ?

    C1 C2 . 1.359(9) ?

    C1 H1 . 0.93 ?

    C2 C3 . 1.356(9) ?

    C2 H2 . 0.93 ?

    C3 C4 . 1.391(9) ?

    C3 H3A . 0.93 ?

    C4 C5 . 1.376(9) ?

    C4 H4A . 0.93 ?

    C5 C6 . 1.499(10) ?

    N4 C28 . 1.337(8) ?

    N4 C24 . 1.348(8) ?

    N4 Mn1 . 2.272(5) ?

    C28 C27 . 1.370(9) ?

    C28 H28 . 0.93 ?

    C27 C26 . 1.375(9) ?

    C27 H27 . 0.93 ?

    C26 C25 . 1.372(9) ?

    C26 H26 . 0.93 ?

    C25 C24 . 1.385(9) ?

    C25 H25 . 0.93 ?

    C24 C23 . 1.500(10) ?

    Br1 Mn1 . 2.6244(14) ?

    Br2 Mn1 . 2.6134(15) ?

    Mn1 N2 . 2.338(6) ?

    Mn1 N3 . 2.346(6) ?

    O4 C19 . 1.334(10) ?

    O4 H4 . 0.82 ?

    O1 C13 . 1.363(8) ?

    O1 H1A . 0.82 ?

    N2 C6 . 1.475(9) ?

    N2 C14 . 1.482(9) ?

    N2 C7 . 1.510(9) ?

    N3 C23 . 1.467(9) ?

    N3 C15 . 1.479(9) ?

    N3 C16 . 1.502(9) ?

    C14 C15 . 1.535(10) ?

    C14 H14A . 0.97 ?

    C14 H14B . 0.97 ?

    C15 H15A . 0.97 ?

    C15 H15B . 0.97 ?

    C16 C17 . 1.510(10) ?

    C16 H16A . 0.97 ?

    C16 H16B . 0.97 ?

    C17 C22 . 1.374(12) ?

    C17 C18 . 1.379(11) ?

    C22 O3 . 1.395(11) ?

    C22 C21 . 1.407(12) ?

    O3 H3 . 0.82 ?

    C21 C20 . 1.328(13) ?

    C21 H21 . 0.93 ?

    C20 C19 . 1.371(13) ?

    C20 H20 . 0.93 ?

    C19 C18 . 1.451(12) ?

    C18 H18 . 0.93 ?

    C23 H23A . 0.97 ?

    C23 H23B . 0.97 ?

    C7 C8 . 1.498(10) ?

    C7 H7A . 0.97 ?

    C7 H7B . 0.97 ?

    C8 C13 . 1.376(10) ?

    C10 C11 . 1.381(14) ?

    C10 O2 . 1.383(10) ?

    C11 C12 . 1.386(11) ?

    C11 H11 . 0.93 ?

    C12 C13 . 1.388(10) ?

    C12 H12 . 0.93 ?

    C6 H6A . 0.97 ?

    C6 H6B . 0.97 ?

    O2 H2A . 0.82 ?


loop_

    _geom_angle_atom_site_label_1

    _geom_angle_atom_site_label_2

    _geom_angle_atom_site_label_3

    _geom_angle_site_symmetry_1

    _geom_angle_site_symmetry_3

    _geom_angle

    _geom_angle_publ_flag

    C10 C9 C8 . . 122.6(9) ?

    C10 C9 H9 . . 118.7 ?

    C8 C9 H9 . . 118.7 ?

    C1 N1 C5 . . 117.2(6) ?

    C1 N1 Mn1 . . 126.9(4) ?

    C5 N1 Mn1 . . 115.3(5) ?

    N1 C1 C2 . . 124.2(7) ?

    N1 C1 H1 . . 117.9 ?

    C2 C1 H1 . . 117.9 ?

    C3 C2 C1 . . 118.7(7) ?

    C3 C2 H2 . . 120.6 ?

    C1 C2 H2 . . 120.6 ?

    C2 C3 C4 . . 119.3(7) ?

    C2 C3 H3A . . 120.3 ?

    C4 C3 H3A . . 120.3 ?

    C5 C4 C3 . . 118.9(7) ?

    C5 C4 H4A . . 120.5 ?

    C3 C4 H4A . . 120.5 ?

    N1 C5 C4 . . 121.6(7) ?

    N1 C5 C6 . . 115.4(6) ?

    C4 C5 C6 . . 123.0(6) ?

    C28 N4 C24 . . 118.2(6) ?

    C28 N4 Mn1 . . 126.1(5) ?

    C24 N4 Mn1 . . 115.6(5) ?

    N4 C28 C27 . . 123.3(7) ?

    N4 C28 H28 . . 118.4 ?

    C27 C28 H28 . . 118.4 ?

    C28 C27 C26 . . 118.6(7) ?

    C28 C27 H27 . . 120.7 ?

    C26 C27 H27 . . 120.7 ?

    C25 C26 C27 . . 119.0(7) ?

    C25 C26 H26 . . 120.5 ?

    C27 C26 H26 . . 120.5 ?

    C26 C25 C24 . . 119.7(7) ?

    C26 C25 H25 . . 120.2 ?

    C24 C25 H25 . . 120.2 ?

    N4 C24 C25 . . 121.2(7) ?

    N4 C24 C23 . . 116.7(6) ?

    C25 C24 C23 . . 122.0(7) ?

    N1 Mn1 N4 . . 164.3(2) ?

    N1 Mn1 N2 . . 74.6(2) ?

    N4 Mn1 N2 . . 94.7(2) ?

    N1 Mn1 N3 . . 93.79(19) ?

    N4 Mn1 N3 . . 72.4(2) ?

    N2 Mn1 N3 . . 77.7(2) ?

    N1 Mn1 Br2 . . 94.64(16) ?

    N4 Mn1 Br2 . . 93.71(16) ?

    N2 Mn1 Br2 . . 165.61(15) ?

    N3 Mn1 Br2 . . 93.85(16) ?

    N1 Mn1 Br1 . . 93.78(14) ?

    N4 Mn1 Br1 . . 98.22(16) ?

    N2 Mn1 Br1 . . 92.59(15) ?

    N3 Mn1 Br1 . . 165.60(15) ?

    Br2 Mn1 Br1 . . 97.73(5) ?

    C13 O1 H1A . . 109.5 ?

    C6 N2 C14 . . 110.1(5) ?

    C6 N2 C7 . . 111.3(6) ?

    C14 N2 C7 . . 111.1(5) ?

    C6 N2 Mn1 . . 103.8(4) ?

    C14 N2 Mn1 . . 107.5(4) ?

    C7 N2 Mn1 . . 112.6(4) ?

    C23 N3 C15 . . 109.0(5) ?

    C23 N3 C16 . . 111.1(6) ?

    C15 N3 C16 . . 111.4(5) ?

    C23 N3 Mn1 . . 106.0(4) ?

    C15 N3 Mn1 . . 106.5(4) ?

    C16 N3 Mn1 . . 112.7(4) ?

    N2 C14 C15 . . 110.9(6) ?

    N2 C14 H14A . . 109.5 ?

    C15 C14 H14A . . 109.5 ?

    N2 C14 H14B . . 109.5 ?

    C15 C14 H14B . . 109.5 ?

    H14A C14 H14B . . 108.0 ?

    N3 C15 C14 . . 110.5(6) ?

    N3 C15 H15A . . 109.6 ?

    C14 C15 H15A . . 109.6 ?

    N3 C15 H15B . . 109.6 ?

    C14 C15 H15B . . 109.6 ?

    H15A C15 H15B . . 108.1 ?

    N3 C16 C17 . . 117.6(6) ?

    N3 C16 H16A . . 107.9 ?

    C17 C16 H16A . . 107.9 ?

    N3 C16 H16B . . 107.9 ?

    C17 C16 H16B . . 107.9 ?

    H16A C16 H16B . . 107.2 ?

    C22 C17 C18 . . 117.9(8) ?

    C22 C17 C16 . . 121.6(8) ?

    C18 C17 C16 . . 120.4(9) ?

    C17 C22 O3 . . 118.0(8) ?

    C17 C22 C21 . . 122.5(10) ?

    O3 C22 C21 . . 119.4(9) ?

    C22 O3 H3 . . 109.5 ?

    C20 C21 C22 . . 119.9(10) ?

    C20 C21 H21 . . 120.1 ?

    C22 C21 H21 . . 120.1 ?

    C21 C20 C19 . . 120.5(10) ?

    C21 C20 H20 . . 119.7 ?

    C19 C20 H20 . . 119.7 ?

    O4 C19 C20 . . 119.2(10) ?

    O4 C19 C18 . . 120.7(10) ?

    C20 C19 C18 . . 120.1(9) ?

    C17 C18 C19 . . 119.0(9) ?

    C17 C18 H18 . . 120.5 ?

    C19 C18 H18 . . 120.5 ?

    N3 C23 C24 . . 111.7(6) ?

    N3 C23 H23A . . 109.3 ?

    C24 C23 H23A . . 109.3 ?

    N3 C23 H23B . . 109.3 ?

    C24 C23 H23B . . 109.3 ?

    H23A C23 H23B . . 107.9 ?

    C8 C7 N2 . . 116.9(6) ?

    C8 C7 H7A . . 108.1 ?

    N2 C7 H7A . . 108.1 ?

    C8 C7 H7B . . 108.1 ?

    N2 C7 H7B . . 108.1 ?

    H7A C7 H7B . . 107.3 ?

    C13 C8 C9 . . 118.3(8) ?

    C13 C8 C7 . . 123.0(7) ?

    C9 C8 C7 . . 118.8(8) ?

    C9 C10 C11 . . 119.8(9) ?

    C9 C10 O2 . . 120.1(11) ?

    C11 C10 O2 . . 120.1(11) ?

    C10 C11 C12 . . 118.9(9) ?

    C10 C11 H11 . . 120.5 ?

    C12 C11 H11 . . 120.5 ?

    C11 C12 C13 . . 120.4(8) ?

    C11 C12 H12 . . 119.8 ?

    C13 C12 H12 . . 119.8 ?

    O1 C13 C8 . . 118.9(7) ?

    O1 C13 C12 . . 121.3(7) ?

    C8 C13 C12 . . 119.8(7) ?

    N2 C6 C5 . . 111.5(6) ?

    N2 C6 H6A . . 109.3 ?

    C5 C6 H6A . . 109.3 ?

    N2 C6 H6B . . 109.3 ?

    C5 C6 H6B . . 109.3 ?

    H6A C6 H6B . . 108.0 ?


loop_

    _geom_torsion_atom_site_label_1

    _geom_torsion_atom_site_label_2

    _geom_torsion_atom_site_label_3

    _geom_torsion_atom_site_label_4

    _geom_torsion_site_symmetry_1

    _geom_torsion_site_symmetry_2

    _geom_torsion_site_symmetry_3

    _geom_torsion_site_symmetry_4

    _geom_torsion

    _geom_torsion_publ_flag

    C5 N1 C1 C2 . . . . -1.0(10) ?

    Mn1 N1 C1 C2 . . . . 169.9(5) ?

    N1 C1 C2 C3 . . . . 1.4(11) ?

    C1 C2 C3 C4 . . . . -1.6(11) ?

    C2 C3 C4 C5 . . . . 1.4(11) ?

    C1 N1 C5 C4 . . . . 0.8(9) ?

    Mn1 N1 C5 C4 . . . . -171.1(5) ?

    C1 N1 C5 C6 . . . . -178.7(6) ?

    Mn1 N1 C5 C6 . . . . 9.4(7) ?

    C3 C4 C5 N1 . . . . -1.1(11) ?

    C3 C4 C5 C6 . . . . 178.4(7) ?

    C24 N4 C28 C27 . . . . -0.3(11) ?

    Mn1 N4 C28 C27 . . . . -176.6(5) ?

    N4 C28 C27 C26 . . . . 1.3(11) ?

    C28 C27 C26 C25 . . . . -1.1(11) ?

    C27 C26 C25 C24 . . . . 0.0(11) ?

    C28 N4 C24 C25 . . . . -0.9(10) ?

    Mn1 N4 C24 C25 . . . . 175.7(5) ?

    C28 N4 C24 C23 . . . . 179.1(6) ?

    Mn1 N4 C24 C23 . . . . -4.2(8) ?

    C26 C25 C24 N4 . . . . 1.1(11) ?

    C26 C25 C24 C23 . . . . -178.9(7) ?

    C1 N1 Mn1 N4 . . . . -109.6(9) ?

    C5 N1 Mn1 N4 . . . . 61.3(10) ?

    C1 N1 Mn1 N2 . . . . -157.9(6) ?

    C5 N1 Mn1 N2 . . . . 13.0(4) ?

    C1 N1 Mn1 N3 . . . . -81.9(5) ?

    C5 N1 Mn1 N3 . . . . 89.1(5) ?

    C1 N1 Mn1 Br2 . . . . 12.3(5) ?

    C5 N1 Mn1 Br2 . . . . -176.7(4) ?

    C1 N1 Mn1 Br1 . . . . 110.4(5) ?

    C5 N1 Mn1 Br1 . . . . -78.6(4) ?

    C28 N4 Mn1 N1 . . . . -132.8(8) ?

    C24 N4 Mn1 N1 . . . . 50.9(11) ?

    C28 N4 Mn1 N2 . . . . -86.5(6) ?

    C24 N4 Mn1 N2 . . . . 97.1(5) ?

    C28 N4 Mn1 N3 . . . . -162.0(6) ?

    C24 N4 Mn1 N3 . . . . 21.7(5) ?

    C28 N4 Mn1 Br2 . . . . 105.2(6) ?

    C24 N4 Mn1 Br2 . . . . -71.2(5) ?

    C28 N4 Mn1 Br1 . . . . 6.8(6) ?

    C24 N4 Mn1 Br1 . . . . -169.6(5) ?

    N1 Mn1 N2 C6 . . . . -31.6(4) ?

    N4 Mn1 N2 C6 . . . . 160.0(4) ?

    N3 Mn1 N2 C6 . . . . -129.1(4) ?

    Br2 Mn1 N2 C6 . . . . -74.3(8) ?

    Br1 Mn1 N2 C6 . . . . 61.6(4) ?

    N1 Mn1 N2 C14 . . . . 85.0(4) ?

    N4 Mn1 N2 C14 . . . . -83.3(4) ?

    N3 Mn1 N2 C14 . . . . -12.5(4) ?

    Br2 Mn1 N2 C14 . . . . 42.4(8) ?

    Br1 Mn1 N2 C14 . . . . 178.2(4) ?

    N1 Mn1 N2 C7 . . . . -152.2(5) ?

    N4 Mn1 N2 C7 . . . . 39.5(5) ?

    N3 Mn1 N2 C7 . . . . 110.3(5) ?

    Br2 Mn1 N2 C7 . . . . 165.1(5) ?

    Br1 Mn1 N2 C7 . . . . -59.0(4) ?

    N1 Mn1 N3 C23 . . . . 153.3(5) ?

    N4 Mn1 N3 C23 . . . . -34.3(4) ?

    N2 Mn1 N3 C23 . . . . -133.4(5) ?

    Br2 Mn1 N3 C23 . . . . 58.4(4) ?

    Br1 Mn1 N3 C23 . . . . -85.1(7) ?

    N1 Mn1 N3 C15 . . . . -90.8(4) ?

    N4 Mn1 N3 C15 . . . . 81.6(4) ?

    N2 Mn1 N3 C15 . . . . -17.5(4) ?

    Br2 Mn1 N3 C15 . . . . 174.3(4) ?

    Br1 Mn1 N3 C15 . . . . 30.8(8) ?

    N1 Mn1 N3 C16 . . . . 31.6(5) ?

    N4 Mn1 N3 C16 . . . . -156.0(5) ?

    N2 Mn1 N3 C16 . . . . 105.0(5) ?

    Br2 Mn1 N3 C16 . . . . -63.3(5) ?

    Br1 Mn1 N3 C16 . . . . 153.2(5) ?

    C6 N2 C14 C15 . . . . 153.2(6) ?

    C7 N2 C14 C15 . . . . -82.9(7) ?

    Mn1 N2 C14 C15 . . . . 40.7(6) ?

    C23 N3 C15 C14 . . . . 159.0(6) ?

    C16 N3 C15 C14 . . . . -78.2(7) ?

    Mn1 N3 C15 C14 . . . . 45.1(6) ?

    N2 C14 C15 N3 . . . . -60.7(8) ?

    C23 N3 C16 C17 . . . . 60.6(9) ?

    C15 N3 C16 C17 . . . . -61.0(9) ?

    Mn1 N3 C16 C17 . . . . 179.4(6) ?

    N3 C16 C17 C22 . . . . 91.8(9) ?

    N3 C16 C17 C18 . . . . -91.8(9) ?

    C18 C17 C22 O3 . . . . -176.7(8) ?

    C16 C17 C22 O3 . . . . -0.2(13) ?

    C18 C17 C22 C21 . . . . -0.4(14) ?

    C16 C17 C22 C21 . . . . 176.2(8) ?

    C17 C22 C21 C20 . . . . 2.5(16) ?

    O3 C22 C21 C20 . . . . 178.8(10) ?

    C22 C21 C20 C19 . . . . -3.5(16) ?

    C21 C20 C19 O4 . . . . -176.6(9) ?

    C21 C20 C19 C18 . . . . 2.6(14) ?

    C22 C17 C18 C19 . . . . -0.6(11) ?

    C16 C17 C18 C19 . . . . -177.2(7) ?

    O4 C19 C18 C17 . . . . 178.7(8) ?

    C20 C19 C18 C17 . . . . -0.5(12) ?

    C15 N3 C23 C24 . . . . -70.1(7) ?

    C16 N3 C23 C24 . . . . 166.8(6) ?

    Mn1 N3 C23 C24 . . . . 44.1(6) ?

    N4 C24 C23 N3 . . . . -28.6(9) ?

    C25 C24 C23 N3 . . . . 151.4(7) ?

    C6 N2 C7 C8 . . . . 45.7(8) ?

    C14 N2 C7 C8 . . . . -77.5(8) ?

    Mn1 N2 C7 C8 . . . . 161.8(5) ?

    C10 C9 C8 C13 . . . . 0.2(13) ?

    C10 C9 C8 C7 . . . . -179.5(8) ?

    N2 C7 C8 C13 . . . . 93.1(9) ?

    N2 C7 C8 C9 . . . . -87.3(9) ?

    C8 C9 C10 C11 . . . . -1.6(15) ?

    C8 C9 C10 O2 . . . . 179.1(9) ?

    C9 C10 C11 C12 . . . . 2.5(14) ?

    O2 C10 C11 C12 . . . . -178.3(9) ?

    C10 C11 C12 C13 . . . . -2.0(13) ?

    C9 C8 C13 O1 . . . . -177.5(7) ?

    C7 C8 C13 O1 . . . . 2.1(11) ?

    C9 C8 C13 C12 . . . . 0.4(11) ?

    C7 C8 C13 C12 . . . . -180.0(7) ?

    C11 C12 C13 O1 . . . . 178.4(7) ?

    C11 C12 C13 C8 . . . . 0.5(11) ?

    C14 N2 C6 C5 . . . . -67.5(7) ?

    C7 N2 C6 C5 . . . . 168.7(6) ?

    Mn1 N2 C6 C5 . . . . 47.3(6) ?

    N1 C5 C6 N2 . . . . -40.6(8) ?

    C4 C5 C6 N2 . . . . 139.9(7) ?


_smtbx_masks_special_details      ?

loop_

  _platon_squeeze_void_nr

  _platon_squeeze_void_average_x

  _platon_squeeze_void_average_y

  _platon_squeeze_void_average_z

  _platon_squeeze_void_volume

  _platon_squeeze_void_count_electrons

  _platon_squeeze_void_content

 1 0.000 0.000 0.000 283.1 73.6 ?

 2 0.500 0.500 0.500 283.1 73.6 ?

_platon_squeeze_details

;

Although there were four peaks within the Fourier diffference map,

the highly disordered solvents within the void were not crystallography

well defined.


The SQUEEZE routine of the program PLATON was used in order to 

eliminate the contribution of disordered solvent molecules,

thereby a final model based only on the ordered part of the crtystal

structure was obtained


The SQUEEZE routine routine suggested that a total potential solvent area 

volume of 566.2 Ang^3 [17.7% of cell volume], and a void electron population

of 146 per cell.Experimental evidence suggests the presence of 1 molecule of

acetonitrile and one water per asymetric unit.


Refinement after the SQUEEZE routine gave significantly improved R values.

[R values before SQUEEZE]

R1 = 0.0864 for >2sigma(I) data

R1 = 0.0864, wR2 = 0.2175, GOOF = S = 1.165 for all data

(4381 data and 0 restraint/ 397 parameters

,

;


#===END


data_[Mn(qtp2)Br2]


_chemical_name_systematic               ?

_chemical_name_common                   'C28 H26 Br2 Mn N4 O8'

_chemical_formula_moiety                ?

_chemical_formula_sum                   'C28 H26 Br2 Mn N4 O8'

_chemical_formula_iupac                 ?

_chemical_formula_weight                761.27


_chemical_melting_point                 ?


_space_group_crystal_system             cubic

_space_group_name_H-M_alt               'I a -3 d'

_space_group_name_Hall                  '-I 4bd 2c 3'

loop_

    _space_group_symop_operation_xyz

    'x, y, z'

    'x+1/4, -z+1/4, y+3/4'

    'x+1/4, z+3/4, -y+3/4'

    'z+1/4, y+3/4, -x+3/4'

    '-z+1/4, y+3/4, x+1/4'

    '-y+1/4, x+3/4, z+1/4'

    'y+1/4, -x+1/4, z+3/4'

    'z, x, y'

    'y, z, x'

    '-y, -z+1/2, x'

    'z, -x, -y+1/2'

    '-y+1/2, z, -x'

    '-z, -x+1/2, y'

    '-z+1/2, x, -y'

    'y, -z, -x+1/2'

    'x, -y, -z+1/2'

    '-x+1/2, y, -z'

    '-x, -y+1/2, z'

    'y+1/4, x+3/4, -z+3/4'

    '-y+1/4, -x+1/4, -z+1/4'

    'z+1/4, -y+1/4, x+3/4'

    '-z+1/4, -y+1/4, -x+1/4'

    '-x+1/4, z+3/4, y+1/4'

    '-x+1/4, -z+1/4, -y+1/4'

    'x+1/2, y+1/2, z+1/2'

    'x+3/4, -z+3/4, y+5/4'

    'x+3/4, z+5/4, -y+5/4'

    'z+3/4, y+5/4, -x+5/4'

    '-z+3/4, y+5/4, x+3/4'

    '-y+3/4, x+5/4, z+3/4'

    'y+3/4, -x+3/4, z+5/4'

    'z+1/2, x+1/2, y+1/2'

    'y+1/2, z+1/2, x+1/2'

    '-y+1/2, -z+1, x+1/2'

    'z+1/2, -x+1/2, -y+1'

    '-y+1, z+1/2, -x+1/2'

    '-z+1/2, -x+1, y+1/2'

    '-z+1, x+1/2, -y+1/2'

    'y+1/2, -z+1/2, -x+1'

    'x+1/2, -y+1/2, -z+1'

    '-x+1, y+1/2, -z+1/2'

    '-x+1/2, -y+1, z+1/2'

    'y+3/4, x+5/4, -z+5/4'

    '-y+3/4, -x+3/4, -z+3/4'

    'z+3/4, -y+3/4, x+5/4'

    '-z+3/4, -y+3/4, -x+3/4'

    '-x+3/4, z+5/4, y+3/4'

    '-x+3/4, -z+3/4, -y+3/4'

    '-x, -y, -z'

    '-x-1/4, z-1/4, -y-3/4'

    '-x-1/4, -z-3/4, y-3/4'

    '-z-1/4, -y-3/4, x-3/4'

    'z-1/4, -y-3/4, -x-1/4'

    'y-1/4, -x-3/4, -z-1/4'

    '-y-1/4, x-1/4, -z-3/4'

    '-z, -x, -y'

    '-y, -z, -x'

    'y, z-1/2, -x'

    '-z, x, y-1/2'

    'y-1/2, -z, x'

    'z, x-1/2, -y'

    'z-1/2, -x, y'

    '-y, z, x-1/2'

    '-x, y, z-1/2'

    'x-1/2, -y, z'

    'x, y-1/2, -z'

    '-y-1/4, -x-3/4, z-3/4'

    'y-1/4, x-1/4, z-1/4'

    '-z-1/4, y-1/4, -x-3/4'

    'z-1/4, y-1/4, x-1/4'

    'x-1/4, -z-3/4, -y-1/4'

    'x-1/4, z-1/4, y-1/4'

    '-x+1/2, -y+1/2, -z+1/2'

    '-x+1/4, z+1/4, -y-1/4'

    '-x+1/4, -z-1/4, y-1/4'

    '-z+1/4, -y-1/4, x-1/4'

    'z+1/4, -y-1/4, -x+1/4'

    'y+1/4, -x-1/4, -z+1/4'

    '-y+1/4, x+1/4, -z-1/4'

    '-z+1/2, -x+1/2, -y+1/2'

    '-y+1/2, -z+1/2, -x+1/2'

    'y+1/2, z, -x+1/2'

    '-z+1/2, x+1/2, y'

    'y, -z+1/2, x+1/2'

    'z+1/2, x, -y+1/2'

    'z, -x+1/2, y+1/2'

    '-y+1/2, z+1/2, x'

    '-x+1/2, y+1/2, z'

    'x, -y+1/2, z+1/2'

    'x+1/2, y, -z+1/2'

    '-y+1/4, -x-1/4, z-1/4'

    'y+1/4, x+1/4, z+1/4'

    '-z+1/4, y+1/4, -x-1/4'

    'z+1/4, y+1/4, x+1/4'

    'x+1/4, -z-1/4, -y+1/4'

    'x+1/4, z+1/4, y+1/4'


_cell_length_a                          34.991(2)

_cell_length_b                          34.991(2)

_cell_length_c                          34.991(2)

_cell_angle_alpha                       90

_cell_angle_beta                        90

_cell_angle_gamma                       90

_cell_volume                            42842.(9)

_cell_formula_units_Z                   48

_cell_measurement_reflns_used           5403

_cell_measurement_theta_min             2.1778

_cell_measurement_theta_max             19.1565

_cell_measurement_temperature           180.(2)


_exptl_crystal_description              plate

_exptl_crystal_colour                   ?

_exptl_crystal_size_max                 0.200

_exptl_crystal_size_mid                 0.100

_exptl_crystal_size_min                 0.010

_exptl_crystal_density_diffrn           1.416

_exptl_crystal_density_meas             ?

_exptl_crystal_density_method           'not measured'

_exptl_crystal_F_000                    18288.0


_exptl_absorpt_coefficient_mu           2.655

_exptl_absorpt_correction_type          multi-scan

_exptl_absorpt_process_details          'SADABS V2014/2 (Bruker AXS Inc.)'

_exptl_absorpt_correction_T_min         0.678

_exptl_absorpt_correction_T_max         0.967


_exptl_special_details                  

;

; 


_diffrn_ambient_temperature             180.(2)

_diffrn_measurement_device_type   'CCD area detector'

_diffrn_measurement_method        'phi and omega scans'

_diffrn_radiation_monochromator   graphite

_diffrn_radiation_type            MoK\a

_diffrn_radiation_wavelength      0.71073

_diffrn_source                    'fine-focus sealed tube'


_diffrn_detector_area_resol_mean        8.3333


_diffrn_reflns_number                   38465

_diffrn_reflns_av_R_equivalents         0.0863

_diffrn_reflns_av_unetI/netI            0.0290

_diffrn_reflns_theta_min                1.65

_diffrn_reflns_theta_max                20.45

_diffrn_reflns_theta_full               20.45

_diffrn_measured_fraction_theta_max     0.999

_diffrn_measured_fraction_theta_full    0.999

_diffrn_reflns_limit_h_min              -34

_diffrn_reflns_limit_h_max              25

_diffrn_reflns_limit_k_min              -34

_diffrn_reflns_limit_k_max              30

_diffrn_reflns_limit_l_min              -34

_diffrn_reflns_limit_l_max              24


_refine_special_details                 

;

;


_reflns_number_total                    1787

_reflns_number_gt                       1350

_reflns_threshold_expression            'I > 2\s(I)'


_refine_ls_structure_factor_coef        Fsqd

_refine_ls_matrix_type                  full

_refine_ls_R_factor_all                 0.0870

_refine_ls_R_factor_gt                  0.0578

_refine_ls_wR_factor_gt                 0.1640

_refine_ls_wR_factor_ref                0.2042

_refine_ls_goodness_of_fit_ref          1.115

_refine_ls_restrained_S_all             1.115

_refine_ls_number_reflns                1787

_refine_ls_number_parameters            195

_refine_ls_number_restraints            0

_refine_ls_number_constraints           ?

_refine_ls_hydrogen_treatment           constr

_refine_ls_weighting_scheme             calc

_refine_ls_weighting_details            

    'w=1/[\s^2^(Fo^2^)+(0.1046P)^2^+958.7400P] where P=(Fo^2^+2Fc^2^)/3'


_atom_sites_solution_hydrogens          geom

_atom_sites_solution_primary            ?

_atom_sites_solution_secondary          ?


_refine_ls_shift/su_max                 0.001

_refine_ls_shift/su_mean                0.000

_refine_diff_density_max                1.002

_refine_diff_density_min                -0.348

_refine_ls_extinction_method            none

_refine_ls_extinction_coef              ?


loop_

    _atom_type_symbol

    _atom_type_description

    _atom_type_scat_dispersion_real

    _atom_type_scat_dispersion_imag

    _atom_type_scat_source

    C C 0.0033 0.0016 'International Tables Vol C Tables 4.2.6.8 and 6.1.1.4'

    H H 0.0000 0.0000 'International Tables Vol C Tables 4.2.6.8 and 6.1.1.4'

    N N 0.0061 0.0033 'International Tables Vol C Tables 4.2.6.8 and 6.1.1.4'

    O O 0.0106 0.0060 'International Tables Vol C Tables 4.2.6.8 and 6.1.1.4'

    Mn Mn 0.3368 0.7283

     'International Tables Vol C Tables 4.2.6.8 and 6.1.1.4'

    Br Br -0.2901 2.4595

     'International Tables Vol C Tables 4.2.6.8 and 6.1.1.4'


_computing_data_collection              ?

_computing_cell_refinement              'SAINT V8.34A (Bruker AXS Inc., 2013)'

_computing_data_reduction               'SAINT V8.34A (Bruker AXS Inc., 2013)'

_computing_structure_solution           ?

_computing_structure_refinement         'SHELXL-2014 (Sheldrick, 2014)'

_computing_molecular_graphics           ?

_computing_publication_material         ?


loop_

    _atom_site_type_symbol

    _atom_site_label

    _atom_site_fract_x

    _atom_site_fract_y

    _atom_site_fract_z

    _atom_site_U_iso_or_equiv

    _atom_site_adp_type

    _atom_site_calc_flag

    _atom_site_refinement_flags_adp

    _atom_site_refinement_flags_occupancy

    _atom_site_refinement_flags_posn

    _atom_site_occupancy

    _atom_site_disorder_assembly

    _atom_site_disorder_group

    Br Br1 0.92149(3) 0.66137(3) 0.04334(3) 0.0407(6) Uani d . . . 1 . .

    Mn Mn2 0.875 0.64994(5) 0.10006(5) 0.0290(7) Uani d T P S 1 . .

    O O1 0.8634(3) 0.6150(3) 0.2498(3) 0.077(3) Uani d . . . 1 . .

    O O2 0.7176(3) 0.6546(3) 0.2570(3) 0.073(3) Uani d . . . 1 . .

    N N1 0.8372(2) 0.6250(2) 0.1514(2) 0.032(2) Uani d . . . 1 . .

    N N2 0.9173(2) 0.6755(2) 0.1413(2) 0.030(2) Uani d . . . 1 . .

    C C1 0.7989(3) 0.6205(3) 0.1339(3) 0.034(3) Uani d . . . 1 . .

    H H6 0.7868 0.646 0.1313 0.041 Uiso calc U . R 1 . .

    H H1 0.7827 0.6049 0.1511 0.041 Uiso calc U . R 1 . .

    C C2 0.8008(3) 0.6017(3) 0.0954(3) 0.028(3) Uani d . . . 1 . .

    C C3 0.7714(3) 0.5790(3) 0.0818(3) 0.036(3) Uani d . . . 1 . .

    H H2 0.7496 0.574 0.0972 0.043 Uiso calc U . R 1 . .

    C C4 0.7744(4) 0.5638(3) 0.0456(3) 0.047(3) Uani d . . . 1 . .

    H H5 0.7542 0.5487 0.0355 0.056 Uiso calc U . R 1 . .

    C C5 0.9431(3) 0.7260(3) 0.1794(3) 0.042(3) Uani d . . . 1 . .

    H H4 0.9403 0.7509 0.19 0.051 Uiso calc U . R 1 . .

    C C6 0.9152(3) 0.7103(3) 0.1569(3) 0.033(3) Uani d . . . 1 . .

    H H3 0.8929 0.725 0.1521 0.04 Uiso calc U . R 1 . .

    C C7 0.8534(3) 0.5873(3) 0.1615(3) 0.036(3) Uani d . . . 1 . .

    H H8 0.8451 0.5681 0.1424 0.044 Uiso calc U . R 1 . .

    H H7 0.8435 0.5793 0.1868 0.044 Uiso calc U . R 1 . .

    C C8 0.8360(3) 0.6527(3) 0.1833(3) 0.037(3) Uani d . . . 1 . .

    H H13 0.8268 0.6775 0.1733 0.044 Uiso calc U . R 1 . .

    H H12 0.8624 0.6567 0.1926 0.044 Uiso calc U . R 1 . .

    C C9 0.8115(3) 0.6418(3) 0.2168(3) 0.038(3) Uani d . . . 1 . .

    C C10 0.8290(4) 0.6214(4) 0.2496(4) 0.059(4) Uani d . . . 1 . .

    C C11 0.8062(5) 0.6093(5) 0.2826(4) 0.087(5) Uani d . . . 1 . .

    H H9 0.8177 0.5953 0.3028 0.104 Uiso calc U . R 1 . .

    C C12 0.7689(5) 0.6183(5) 0.2838(4) 0.082(5) Uani d . . . 1 . .

    H H10 0.7537 0.609 0.3043 0.098 Uiso calc U . R 1 . .

    C C13 0.7509(5) 0.6426(4) 0.2539(4) 0.059(4) Uani d . . . 1 . .

    C C14 0.7746(3) 0.6524(3) 0.2194(3) 0.043(3) Uani d . . . 1 . .

    H H11 0.7633 0.6664 0.1991 0.051 Uiso calc U . R 1 . .

    O O1S 0.2011(8) 0.2080(5) 0.9972(7) 0.268(14) Uani d . . . 1 . .

    O O2S 0.3733(9) 0.7316(6) 0.0442(6) 0.244(13) Uani d . . . 1 . .


loop_

    _atom_site_aniso_label

    _atom_site_aniso_U_11

    _atom_site_aniso_U_22

    _atom_site_aniso_U_33

    _atom_site_aniso_U_12

    _atom_site_aniso_U_13

    _atom_site_aniso_U_23

    Br1 0.0318(8) 0.0573(9) 0.0330(8) -0.0053(6) 0.0021(5) -0.0073(6)

    Mn2 0.0243(13) 0.0313(9) 0.0313(9) 0.0010(7) 0.0010(7) -0.0052(10)

    O1 0.070(7) 0.115(9) 0.046(6) 0.022(6) 0.001(5) 0.005(6)

    O2 0.056(6) 0.082(7) 0.081(7) -0.007(5) 0.027(6) -0.020(6)

    N1 0.025(5) 0.038(6) 0.032(5) -0.001(4) 0.003(4) -0.006(4)

    N2 0.029(6) 0.025(6) 0.035(5) -0.002(4) -0.001(4) -0.009(4)

    C1 0.026(6) 0.040(7) 0.036(7) -0.001(5) 0.003(5) -0.008(6)

    C2 0.021(6) 0.033(7) 0.031(7) 0.010(5) 0.007(5) -0.006(5)

    C3 0.029(7) 0.044(7) 0.034(8) -0.004(6) 0.002(6) -0.002(6)

    C4 0.043(8) 0.052(8) 0.045(8) -0.009(6) -0.007(7) -0.005(7)

    C5 0.043(8) 0.031(7) 0.053(8) 0.005(7) -0.011(7) -0.008(6)

    C6 0.030(7) 0.025(7) 0.045(7) 0.001(5) 0.000(6) 0.001(6)

    C7 0.044(6) 0.035(7) 0.030(7) -0.003(6) -0.001(5) -0.002(5)

    C8 0.028(7) 0.048(8) 0.035(7) 0.003(5) 0.002(5) -0.015(6)

    C9 0.042(8) 0.044(7) 0.029(7) -0.005(6) -0.002(6) -0.013(6)

    C10 0.058(10) 0.065(9) 0.056(10) 0.002(8) 0.009(8) -0.011(8)

    C11 0.078(13) 0.132(15) 0.050(10) 0.002(11) 0.015(9) 0.014(9)

    C12 0.091(13) 0.107(13) 0.048(10) -0.020(11) 0.032(9) 0.005(9)

    C13 0.063(10) 0.060(9) 0.054(9) -0.016(8) 0.026(8) -0.023(8)

    C14 0.048(9) 0.043(8) 0.037(7) -0.007(6) 0.009(6) -0.012(6)

    O1S 0.45(4) 0.112(13) 0.24(2) -0.008(17) -0.19(2) -0.078(14)

    O2S 0.32(3) 0.24(2) 0.177(18) 0.15(2) -0.01(2) -0.003(17)


_geom_special_details                   

;

All esds (except the esd in the dihedral angle between two l.s. planes)

are estimated using the full covariance matrix.  The cell esds are taken

into account individually in the estimation of esds in distances, angles

and torsion angles; correlations between esds in cell parameters are only

used when they are defined by crystal symmetry.  An approximate (isotropic)

treatment of cell esds is used for estimating esds involving l.s. planes.

;


loop_

    _geom_bond_atom_site_label_1

    _geom_bond_atom_site_label_2

    _geom_bond_site_symmetry_2

    _geom_bond_distance

    _geom_bond_publ_flag

    Br1 Mn2 . 2.5971(19) ?

    Mn2 N2 48_655 2.252(8) ?

    Mn2 N2 . 2.252(8) ?

    Mn2 N1 . 2.395(8) ?

    Mn2 N1 48_655 2.395(8) ?

    Mn2 Br1 48_655 2.5971(19) ?

    O1 C10 . 1.226(15) ?

    O2 C13 . 1.242(16) ?

    N1 C8 . 1.480(13) ?

    N1 C1 . 1.480(13) ?

    N1 C7 . 1.481(13) ?

    N2 C6 . 1.337(13) ?

    N2 C2 48_655 1.355(13) ?

    C1 C2 . 1.503(14) ?

    C1 H6 . 0.99 ?

    C1 H1 . 0.99 ?

    C2 N2 48_655 1.355(13) ?

    C2 C3 . 1.385(15) ?

    C3 C4 . 1.377(16) ?

    C3 H2 . 0.95 ?

    C4 C5 48_655 1.386(16) ?

    C4 H5 . 0.95 ?

    C5 C6 . 1.371(15) ?

    C5 C4 48_655 1.386(16) ?

    C5 H4 . 0.95 ?

    C6 H3 . 0.95 ?

    C7 C7 48_655 1.51(2) ?

    C7 H8 . 0.99 ?

    C7 H7 . 0.99 ?

    C8 C9 . 1.502(16) ?

    C8 H13 . 0.99 ?

    C8 H12 . 0.99 ?

    C9 C14 . 1.347(16) ?

    C9 C10 . 1.484(18) ?

    C10 C11 . 1.46(2) ?

    C11 C12 . 1.34(2) ?

    C11 H9 . 0.95 ?

    C12 C13 . 1.49(2) ?

    C12 H10 . 0.95 ?

    C13 C14 . 1.502(17) ?

    C14 H11 . 0.95 ?

    O2S O2S 48 1.28(4) ?


loop_

    _geom_angle_atom_site_label_1

    _geom_angle_atom_site_label_2

    _geom_angle_atom_site_label_3

    _geom_angle_site_symmetry_1

    _geom_angle_site_symmetry_3

    _geom_angle

    _geom_angle_publ_flag

    N2 Mn2 N2 48_655 . 160.1(4) ?

    N2 Mn2 N1 48_655 . 72.6(3) ?

    N2 Mn2 N1 . . 91.6(3) ?

    N2 Mn2 N1 48_655 48_655 91.6(3) ?

    N2 Mn2 N1 . 48_655 72.6(3) ?

    N1 Mn2 N1 . 48_655 76.1(4) ?

    N2 Mn2 Br1 48_655 48_655 91.0(2) ?

    N2 Mn2 Br1 . 48_655 102.0(2) ?

    N1 Mn2 Br1 . 48_655 92.7(2) ?

    N1 Mn2 Br1 48_655 48_655 167.2(2) ?

    N2 Mn2 Br1 48_655 . 102.0(2) ?

    N2 Mn2 Br1 . . 91.0(2) ?

    N1 Mn2 Br1 . . 167.2(2) ?

    N1 Mn2 Br1 48_655 . 92.7(2) ?

    Br1 Mn2 Br1 48_655 . 99.04(9) ?

    C8 N1 C1 . . 110.9(8) ?

    C8 N1 C7 . . 114.5(8) ?

    C1 N1 C7 . . 110.5(8) ?

    C8 N1 Mn2 . . 110.1(6) ?

    C1 N1 Mn2 . . 103.3(6) ?

    C7 N1 Mn2 . . 107.0(6) ?

    C6 N2 C2 . 48_655 117.5(9) ?

    C6 N2 Mn2 . . 125.9(7) ?

    C2 N2 Mn2 48_655 . 116.3(7) ?

    N1 C1 C2 . . 112.1(8) ?

    N1 C1 H6 . . 109.2 ?

    C2 C1 H6 . . 109.2 ?

    N1 C1 H1 . . 109.2 ?

    C2 C1 H1 . . 109.2 ?

    H6 C1 H1 . . 107.9 ?

    N2 C2 C3 48_655 . 122.1(9) ?

    N2 C2 C1 48_655 . 116.2(9) ?

    C3 C2 C1 . . 121.7(9) ?

    C4 C3 C2 . . 118.7(11) ?

    C4 C3 H2 . . 120.6 ?

    C2 C3 H2 . . 120.6 ?

    C3 C4 C5 . 48_655 119.9(11) ?

    C3 C4 H5 . . 120.1 ?

    C5 C4 H5 48_655 . 120.1 ?

    C6 C5 C4 . 48_655 117.6(11) ?

    C6 C5 H4 . . 121.2 ?

    C4 C5 H4 48_655 . 121.2 ?

    N2 C6 C5 . . 124.1(10) ?

    N2 C6 H3 . . 117.9 ?

    C5 C6 H3 . . 117.9 ?

    N1 C7 C7 . 48_655 111.4(7) ?

    N1 C7 H8 . . 109.4 ?

    C7 C7 H8 48_655 . 109.4 ?

    N1 C7 H7 . . 109.4 ?

    C7 C7 H7 48_655 . 109.4 ?

    H8 C7 H7 . . 108.0 ?

    N1 C8 C9 . . 116.1(9) ?

    N1 C8 H13 . . 108.3 ?

    C9 C8 H13 . . 108.3 ?

    N1 C8 H12 . . 108.3 ?

    C9 C8 H12 . . 108.3 ?

    H13 C8 H12 . . 107.4 ?

    C14 C9 C10 . . 118.4(11) ?

    C14 C9 C8 . . 121.9(11) ?

    C10 C9 C8 . . 119.4(11) ?

    O1 C10 C11 . . 118.6(14) ?

    O1 C10 C9 . . 119.8(12) ?

    C11 C10 C9 . . 121.6(13) ?

    C12 C11 C10 . . 119.1(15) ?

    C12 C11 H9 . . 120.4 ?

    C10 C11 H9 . . 120.4 ?

    C11 C12 C13 . . 121.5(14) ?

    C11 C12 H10 . . 119.3 ?

    C13 C12 H10 . . 119.3 ?

    O2 C13 C12 . . 121.8(13) ?

    O2 C13 C14 . . 120.8(14) ?

    C12 C13 C14 . . 117.5(13) ?

    C9 C14 C13 . . 121.3(12) ?

    C9 C14 H11 . . 119.3 ?

    C13 C14 H11 . . 119.3 ?


loop_

    _geom_torsion_atom_site_label_1

    _geom_torsion_atom_site_label_2

    _geom_torsion_atom_site_label_3

    _geom_torsion_atom_site_label_4

    _geom_torsion_site_symmetry_1

    _geom_torsion_site_symmetry_2

    _geom_torsion_site_symmetry_3

    _geom_torsion_site_symmetry_4

    _geom_torsion

    _geom_torsion_publ_flag

    C8 N1 C1 C2 . . . . 164.0(9) ?

    C7 N1 C1 C2 . . . . -68.0(11) ?

    Mn2 N1 C1 C2 . . . . 46.1(9) ?

    N1 C1 C2 N2 . . . 48_655 -31.6(13) ?

    N1 C1 C2 C3 . . . . 149.2(10) ?

    N2 C2 C3 C4 48_655 . . . -1.6(16) ?

    C1 C2 C3 C4 . . . . 177.6(10) ?

    C2 C3 C4 C5 . . . 48_655 1.7(17) ?

    C2 N2 C6 C5 48_655 . . . 0.0(16) ?

    Mn2 N2 C6 C5 . . . . -174.3(9) ?

    C4 C5 C6 N2 48_655 . . . 0.2(17) ?

    C8 N1 C7 C7 . . . 48_655 -78.9(12) ?

    C1 N1 C7 C7 . . . 48_655 155.1(10) ?

    Mn2 N1 C7 C7 . . . 48_655 43.4(11) ?

    C1 N1 C8 C9 . . . . 63.2(12) ?

    C7 N1 C8 C9 . . . . -62.5(12) ?

    Mn2 N1 C8 C9 . . . . 176.9(8) ?

    N1 C8 C9 C14 . . . . -91.9(13) ?

    N1 C8 C9 C10 . . . . 93.0(12) ?

    C14 C9 C10 O1 . . . . -172.2(12) ?

    C8 C9 C10 O1 . . . . 3.0(18) ?

    C14 C9 C10 C11 . . . . 6.2(19) ?

    C8 C9 C10 C11 . . . . -178.6(12) ?

    O1 C10 C11 C12 . . . . 175.8(16) ?

    C9 C10 C11 C12 . . . . -3.(2) ?

    C10 C11 C12 C13 . . . . -4.(3) ?

    C11 C12 C13 O2 . . . . -171.9(15) ?

    C11 C12 C13 C14 . . . . 8.(2) ?

    C10 C9 C14 C13 . . . . -2.4(16) ?

    C8 C9 C14 C13 . . . . -177.5(10) ?

    O2 C13 C14 C9 . . . . 175.6(11) ?

    C12 C13 C14 C9 . . . . -4.2(17) ?


loop_

    _geom_hbond_atom_site_label_D

    _geom_hbond_atom_site_label_H

    _geom_hbond_atom_site_label_A

    _geom_hbond_site_symmetry_A

    _geom_hbond_distance_DH

    _geom_hbond_distance_HA

    _geom_hbond_distance_DA

    _geom_hbond_angle_DHA

    _geom_hbond_publ_flag

    C14 H11 O2 59_655 0.95 2.48 3.403(17) 164.3 ?

    C8 H13 Br1 48_655 0.99 3.13 3.823(12) 127.9 ?

    C7 H7 O1 . 0.99 2.63 3.258(15) 121.6 ?

    C5 H4 Br1 78_575 0.95 2.96 3.874(11) 162.3 ?

    C3 H2 Br1 52_675 0.95 3.05 3.885(11) 148.0 ?

    C1 H1 Br1 52_675 0.99 2.81 3.659(10) 144.0 ?

    C1 H6 Br1 48_655 0.99 2.98 3.560(11) 118.7 ?

    C14 H11 O2 59_655 0.95 2.48 3.403(17) 164.3 ?

    C8 H13 Br1 48_655 0.99 3.13 3.823(12) 127.9 ?

    C7 H7 O1 . 0.99 2.63 3.258(15) 121.6 ?

    C5 H4 Br1 78_575 0.95 2.96 3.874(11) 162.3 ?

    C3 H2 Br1 52_675 0.95 3.05 3.885(11) 148.0 ?

    C1 H1 Br1 52_675 0.99 2.81 3.659(10) 144.0 ?

    C1 H6 Br1 48_655 0.99 2.98 3.560(11) 118.7 ?

    C14 H11 O2 59_655 0.95 2.48 3.403(17) 164.3 ?

    C8 H13 Br1 48_655 0.99 3.13 3.823(12) 127.9 ?

    C7 H7 O1 . 0.99 2.63 3.258(15) 121.6 ?

    C5 H4 Br1 78_575 0.95 2.96 3.874(11) 162.3 ?

    C3 H2 Br1 52_675 0.95 3.05 3.885(11) 148.0 ?

    C1 H1 Br1 52_675 0.99 2.81 3.659(10) 144.0 ?

    C1 H6 Br1 48_655 0.99 2.98 3.560(11) 118.7 ?

    C14 H11 O2 59_655 0.95 2.48 3.403(17) 164.3 ?

    C8 H13 Br1 48_655 0.99 3.13 3.823(12) 127.9 ?

    C7 H7 O1 . 0.99 2.63 3.258(15) 121.6 ?

    C5 H4 Br1 78_575 0.95 2.96 3.874(11) 162.3 ?

    C3 H2 Br1 52_675 0.95 3.05 3.885(11) 148.0 ?

    C1 H1 Br1 52_675 0.99 2.81 3.659(10) 144.0 ?

    C1 H6 Br1 48_655 0.99 2.98 3.560(11) 118.7 ?

    C14 H11 O2 59_655 0.95 2.48 3.403(17) 164.3 ?

    C8 H13 Br1 48_655 0.99 3.13 3.823(12) 127.9 ?

    C7 H7 O1 . 0.99 2.63 3.258(15) 121.6 ?

    C5 H4 Br1 78_575 0.95 2.96 3.874(11) 162.3 ?

    C3 H2 Br1 52_675 0.95 3.05 3.885(11) 148.0 ?

    C1 H1 Br1 52_675 0.99 2.81 3.659(10) 144.0 ?

    C1 H6 Br1 48_655 0.99 2.98 3.560(11) 118.7 ?

    C14 H11 O2 59_655 0.95 2.48 3.403(17) 164.3 ?

    C8 H13 Br1 48_655 0.99 3.13 3.823(12) 127.9 ?

    C7 H7 O1 . 0.99 2.63 3.258(15) 121.6 ?

    C5 H4 Br1 78_575 0.95 2.96 3.874(11) 162.3 ?

    C3 H2 Br1 52_675 0.95 3.05 3.885(11) 148.0 ?

    C1 H1 Br1 52_675 0.99 2.81 3.659(10) 144.0 ?

    C1 H6 Br1 48_655 0.99 2.98 3.560(11) 118.7 ?

    C14 H11 O2 59_655 0.95 2.48 3.403(17) 164.3 ?

    C8 H13 Br1 48_655 0.99 3.13 3.823(12) 127.9 ?

    C7 H7 O1 . 0.99 2.63 3.258(15) 121.6 ?

    C5 H4 Br1 78_575 0.95 2.96 3.874(11) 162.3 ?

    C3 H2 Br1 52_675 0.95 3.05 3.885(11) 148.0 ?

    C1 H1 Br1 52_675 0.99 2.81 3.659(10) 144.0 ?

    C1 H6 Br1 48_655 0.99 2.98 3.560(11) 118.7 ?

    C14 H11 O2 59_655 0.95 2.48 3.403(17) 164.3 ?

    C8 H13 Br1 48_655 0.99 3.13 3.823(12) 127.9 ?

    C7 H7 O1 . 0.99 2.63 3.258(15) 121.6 ?

    C5 H4 Br1 78_575 0.95 2.96 3.874(11) 162.3 ?

    C3 H2 Br1 52_675 0.95 3.05 3.885(11) 148.0 ?

    C1 H1 Br1 52_675 0.99 2.81 3.659(10) 144.0 ?

    C1 H6 Br1 48_655 0.99 2.98 3.560(11) 118.7 ?

    C14 H11 O2 59_655 0.95 2.48 3.403(17) 164.3 ?

    C8 H13 Br1 48_655 0.99 3.13 3.823(12) 127.9 ?

    C7 H7 O1 . 0.99 2.63 3.258(15) 121.6 ?

    C5 H4 Br1 78_575 0.95 2.96 3.874(11) 162.3 ?

    C3 H2 Br1 52_675 0.95 3.05 3.885(11) 148.0 ?

    C1 H1 Br1 52_675 0.99 2.81 3.659(10) 144.0 ?

    C1 H6 Br1 48_655 0.99 2.98 3.560(11) 118.7 ?

    C14 H11 O2 59_655 0.95 2.48 3.403(17) 164.3 ?

    C8 H13 Br1 48_655 0.99 3.13 3.823(12) 127.9 ?

    C7 H7 O1 . 0.99 2.63 3.258(15) 121.6 ?

    C5 H4 Br1 78_575 0.95 2.96 3.874(11) 162.3 ?

    C3 H2 Br1 52_675 0.95 3.05 3.885(11) 148.0 ?

    C1 H1 Br1 52_675 0.99 2.81 3.659(10) 144.0 ?

    C1 H6 Br1 48_655 0.99 2.98 3.560(11) 118.7 ?

    C14 H11 O2 59_655 0.95 2.48 3.403(17) 164.3 ?

    C8 H13 Br1 48_655 0.99 3.13 3.823(12) 127.9 ?

    C7 H7 O1 . 0.99 2.63 3.258(15) 121.6 ?

    C5 H4 Br1 78_575 0.95 2.96 3.874(11) 162.3 ?

    C3 H2 Br1 52_675 0.95 3.05 3.885(11) 148.0 ?

    C1 H1 Br1 52_675 0.99 2.81 3.659(10) 144.0 ?

    C1 H6 Br1 48_655 0.99 2.98 3.560(11) 118.7 ?

    C14 H11 O2 59_655 0.95 2.48 3.403(17) 164.3 ?

    C8 H13 Br1 48_655 0.99 3.13 3.823(12) 127.9 ?

    C7 H7 O1 . 0.99 2.63 3.258(15) 121.6 ?

    C5 H4 Br1 78_575 0.95 2.96 3.874(11) 162.3 ?

    C3 H2 Br1 52_675 0.95 3.05 3.885(11) 148.0 ?

    C1 H1 Br1 52_675 0.99 2.81 3.659(10) 144.0 ?

    C1 H6 Br1 48_655 0.99 2.98 3.560(11) 118.7 ?

    C14 H11 O2 59_655 0.95 2.48 3.403(17) 164.3 ?

    C7 H7 O1 . 0.99 2.63 3.258(15) 121.6 ?

    C5 H4 Br1 78_575 0.95 2.96 3.874(11) 162.3 ?

    C3 H2 Br1 52_675 0.95 3.05 3.885(11) 148.0 ?

    C1 H1 Br1 52_675 0.99 2.81 3.659(10) 144.0 ?

    C1 H6 Br1 48_655 0.99 2.98 3.560(11) 118.7 ?

    C14 H11 O2 59_655 0.95 2.48 3.403(17) 164.3 ?

    C7 H7 O1 . 0.99 2.63 3.258(15) 121.6 ?

    C5 H4 Br1 78_575 0.95 2.96 3.874(11) 162.3 ?

    C3 H2 Br1 52_675 0.95 3.05 3.885(11) 148.0 ?

    C1 H1 Br1 52_675 0.99 2.81 3.659(10) 144.0 ?

    C1 H6 Br1 48_655 0.99 2.98 3.560(11) 118.7 ?

    C14 H11 O2 59_655 0.95 2.48 3.403(17) 164.3 ?

    C7 H7 O1 . 0.99 2.63 3.258(15) 121.6 ?

    C5 H4 Br1 78_575 0.95 2.96 3.874(11) 162.3 ?

    C3 H2 Br1 52_675 0.95 3.05 3.885(11) 148.0 ?

    C1 H1 Br1 52_675 0.99 2.81 3.659(10) 144.0 ?

    C1 H6 Br1 48_655 0.99 2.98 3.560(11) 118.7 ?

    C14 H11 O2 59_655 0.95 2.48 3.403(17) 164.3 ?

    C7 H7 O1 . 0.99 2.63 3.258(15) 121.6 ?

    C5 H4 Br1 78_575 0.95 2.96 3.874(11) 162.3 ?

    C3 H2 Br1 52_675 0.95 3.05 3.885(11) 148.0 ?

    C1 H6 Br1 48_655 0.99 2.98 3.560(11) 118.7 ?

    C1 H1 Br1 52_675 0.99 2.81 3.659(10) 144.0 ?

    C14 H11 O2 59_655 0.95 2.48 3.403(17) 164.3 ?

    C7 H7 O1 . 0.99 2.63 3.258(15) 121.6 ?

    C1 H6 Br1 48_655 0.99 2.98 3.560(11) 118.7 ?

    C1 H1 Br1 52_675 0.99 2.81 3.659(10) 144.0 ?

    C3 H2 Br1 52_675 0.95 3.05 3.885(11) 148.0 ?

    C5 H4 Br1 78_575 0.95 2.96 3.874(11) 162.3 ?

    C7 H7 O1 . 0.99 2.63 3.258(15) 121.6 ?

    C8 H13 Br1 48_655 0.99 3.13 3.823(12) 127.9 ?

    C14 H11 O2 59_655 0.95 2.48 3.403(17) 164.3 ?

    C1 H6 Br1 48_655 0.99 2.98 3.560(11) 118.7 ?

    C1 H1 Br1 52_675 0.99 2.81 3.659(10) 144.0 ?

    C3 H2 Br1 52_675 0.95 3.05 3.885(11) 148.0 ?

    C5 H4 Br1 78_575 0.95 2.96 3.874(11) 162.3 ?

    C7 H7 O1 . 0.99 2.63 3.258(15) 121.6 ?

    C8 H13 Br1 48_655 0.99 3.13 3.823(12) 127.9 ?

    C14 H11 O2 59_655 0.95 2.48 3.403(17) 164.3 ?

    C1 H6 Br1 48_655 0.99 2.98 3.560(11) 118.7 ?

    C1 H1 Br1 52_675 0.99 2.81 3.659(10) 144.0 ?

    C3 H2 Br1 52_675 0.95 3.05 3.885(11) 148.0 ?

    C5 H4 Br1 78_575 0.95 2.96 3.874(11) 162.3 ?

    C7 H7 O1 . 0.99 2.63 3.258(15) 121.6 ?

    C8 H13 Br1 48_655 0.99 3.13 3.823(12) 127.9 ?

    C14 H11 O2 59_655 0.95 2.48 3.403(17) 164.3 ?

    C1 H6 Br1 48_655 0.99 2.98 3.560(11) 118.7 ?

    C1 H1 Br1 52_675 0.99 2.81 3.659(10) 144.0 ?

    C3 H2 Br1 52_675 0.95 3.05 3.885(11) 148.0 ?

    C5 H4 Br1 78_575 0.95 2.96 3.874(11) 162.3 ?

    C7 H7 O1 . 0.99 2.63 3.258(15) 121.6 ?

    C8 H13 Br1 48_655 0.99 3.13 3.823(12) 127.9 ?

    C14 H11 O2 59_655 0.95 2.48 3.403(17) 164.3 ?

    C1 H6 Br1 48_655 0.99 2.98 3.560(11) 118.7 ?

    C1 H1 Br1 52_675 0.99 2.81 3.659(10) 144.0 ?

    C3 H2 Br1 52_675 0.95 3.05 3.885(11) 148.0 ?

    C5 H4 Br1 78_575 0.95 2.96 3.874(11) 162.3 ?

    C7 H7 O1 . 0.99 2.63 3.258(15) 121.6 ?

    C8 H13 Br1 48_655 0.99 3.13 3.823(12) 127.9 ?

    C14 H11 O2 59_655 0.95 2.48 3.403(17) 164.3 ?

    C1 H6 Br1 48_655 0.99 2.98 3.560(11) 118.7 ?

    C1 H1 Br1 52_675 0.99 2.81 3.659(10) 144.0 ?

    C3 H2 Br1 52_675 0.95 3.05 3.885(11) 148.0 ?

    C5 H4 Br1 78_575 0.95 2.96 3.874(11) 162.3 ?

    C7 H7 O1 . 0.99 2.63 3.258(15) 121.6 ?

    C8 H13 Br1 48_655 0.99 3.13 3.823(12) 127.9 ?

    C14 H11 O2 59_655 0.95 2.48 3.403(17) 164.3 ?

    C1 H6 Br1 48_655 0.99 2.98 3.560(11) 118.7 ?

    C1 H1 Br1 52_675 0.99 2.81 3.659(10) 144.0 ?

    C3 H2 Br1 52_675 0.95 3.05 3.885(11) 148.0 ?

    C5 H4 Br1 78_575 0.95 2.96 3.874(11) 162.3 ?

    C7 H7 O1 . 0.99 2.63 3.258(15) 121.6 ?

    C8 H13 Br1 48_655 0.99 3.13 3.823(12) 127.9 ?

    C14 H11 O2 59_655 0.95 2.48 3.403(17) 164.3 ?

    C1 H6 Br1 48_655 0.99 2.98 3.560(11) 118.7 ?

    C1 H1 Br1 52_675 0.99 2.81 3.659(10) 144.0 ?

    C3 H2 Br1 52_675 0.95 3.05 3.885(11) 148.0 ?

    C5 H4 Br1 78_575 0.95 2.96 3.874(11) 162.3 ?

    C7 H7 O1 . 0.99 2.63 3.258(15) 121.6 ?

    C8 H13 Br1 48_655 0.99 3.13 3.823(12) 127.9 ?

    C14 H11 O2 59_655 0.95 2.48 3.403(17) 164.3 ?

    C1 H6 Br1 48_655 0.99 2.98 3.560(11) 118.7 ?

    C1 H1 Br1 52_675 0.99 2.81 3.659(10) 144.0 ?

    C3 H2 Br1 52_675 0.95 3.05 3.885(11) 148.0 ?

    C5 H4 Br1 78_575 0.95 2.96 3.874(11) 162.3 ?

    C7 H7 O1 . 0.99 2.63 3.258(15) 121.6 ?

    C8 H13 Br1 48_655 0.99 3.13 3.823(12) 127.9 ?

    C14 H11 O2 59_655 0.95 2.48 3.403(17) 164.3 ?

    C1 H6 Br1 48_655 0.99 2.98 3.560(11) 118.7 ?

    C1 H1 Br1 52_675 0.99 2.81 3.659(10) 144.0 ?

    C3 H2 Br1 52_675 0.95 3.05 3.885(11) 148.0 ?

    C5 H4 Br1 78_575 0.95 2.96 3.874(11) 162.3 ?

    C7 H7 O1 . 0.99 2.63 3.258(15) 121.6 ?

    C8 H13 Br1 48_655 0.99 3.13 3.823(12) 127.9 ?

    C14 H11 O2 59_655 0.95 2.48 3.403(17) 164.3 ?

    C1 H6 Br1 48_655 0.99 2.98 3.560(11) 118.7 ?

    C1 H1 Br1 52_675 0.99 2.81 3.659(10) 144.0 ?

    C3 H2 Br1 52_675 0.95 3.05 3.885(11) 148.0 ?

    C5 H4 Br1 78_575 0.95 2.96 3.874(11) 162.3 ?

    C7 H7 O1 . 0.99 2.63 3.258(15) 121.6 ?

    C8 H13 Br1 48_655 0.99 3.13 3.823(12) 127.9 ?

    C14 H11 O2 59_655 0.95 2.48 3.403(17) 164.3 ?

    C1 H6 Br1 48_655 0.99 2.98 3.560(11) 118.7 ?

    C1 H1 Br1 52_675 0.99 2.81 3.659(10) 144.0 ?

    C3 H2 Br1 52_675 0.95 3.05 3.885(11) 148.0 ?

    C5 H4 Br1 78_575 0.95 2.96 3.874(11) 162.3 ?

    C7 H7 O1 . 0.99 2.63 3.258(15) 121.6 ?

    C8 H13 Br1 48_655 0.99 3.13 3.823(12) 127.9 ?

    C14 H11 O2 59_655 0.95 2.48 3.403(17) 164.3 ?


# start Validation Reply Form

_vrf_PLAT417_pna2

;

PROBLEM: Short Inter D-H..H-D       H2A    ..  H99     ..       2.09 Ang.  

RESPONSE: Proton present on disordered trifluoroacetic acid. Data resolution

was not sufficient to resolve more accurately estimate position.

;

_vrf_THETM01_MnH4qtp2Br2

;

PROBLEM: The value of sine(theta_max)/wavelength is less than 0.550


RESPONSE:The severe disorder in the crystal, as well as overall

low crystal quality led to a theta maximum of 20.8 degrees. The

data collection was appropriate to the sample and conditions, and

unambiguously establishes the stereochemistry and absolute 

configuration of the molecule.


;

_vrf_CHEMW03_MnH4qtp2Br2

;

PROBLEM: WARNING: The ratio of given/expected molecular weight as

RESPONSE: SQUEEZE used to remove disordered solvent molecules, 

but the reported formula includes the solvent. See _refine_special_details.

;

_vrf_PLAT420_MnH4qtp2Br2

;

PROBLEM: D-H Without Acceptor        O1     -   H1A    ..     Please Check 

RESPONSE: SQUEEZE used to remove disordered solvent molecules.

;

_vrf_THETM01_Mnqtp2Br2

;

PROBLEM: The value of sine(theta_max)/wavelength is less than 0.550


RESPONSE:The severe disorder in the crystal, as well as overall

low crystal quality led to a theta maximum of 20.5 degrees. The

data collection was appropriate to the sample and conditions, and

unambiguously establishes the stereochemistry and absolute 

configuration of the molecule.


;


_vrf_PLAT306_Mnqtp2Br2
;
PROBLEM: Isolated Oxygen Atom (H-atoms Missing ?) .......        O1S Check 
RESPONSE: Hydrogen atoms of the solvate water molecules were not located 
but were included in the formula.
;
_vrf_PLAT341_Mnqtp2Br2
;
PROBLEM: Low Bond Precision on  C-C Bonds ...............    0.01677 Ang.  
RESPONSE: The largest crystal available diffracted quite weakly at high angle.
Several crystals were attempted and these were the best data collected.
;
_vrf_PLAT430_Mnqtp2Br2
;
PROBLEM: Short Inter D...A Contact  O1S    ..  O2S     ..       2.82 Ang.  
RESPONSE: Hydrogen atoms of the solvate water molecules were not located 
but were included in the formula.
;


# end Validation Reply Form
